# Supplementary material for: On direct synthesis of high quality APbX3 (A = Cs+, MA+ and FA+; X = Cl−, Br− and I−) nanocrystals following a generic approach
Source: Royal Society of Chemistry journal article supplement (doi:10.1039/d2nr01305c), 2022-01-01
Supplement: d2nr01305c1.pdf [file d2nr01305c1.pdf]

## **Supporting Information**

### **On Direct Synthesis of High Quality APbX<sub>3</sub> (A= Cs<sup>+</sup>, MA<sup>+</sup> and FA<sup>+</sup>; X= Cl<sup>-</sup>, Br<sup>-</sup> and I<sup>-</sup>) Nanocrystals Following a Generic Approach**

Somnath Das and Anunay Samanta\*

*School of Chemistry, University of Hyderabad, Hyderabad 500046, India*

\*Corresponding author's Email: [anunay@uohyd.ac.in](mailto:anunay@uohyd.ac.in)

## Contents

### Experimental section

#### Characterization of samples

**Scheme:** Scheme S1: Reaction steps in the preparation of APbX<sub>3</sub> NCs.

**Figures:** Fig. S1: Chemical structure of DXDMH.

Fig. S2: PLQY, PXRD pattern and TEM images of the NCs prepared using lower halide content.

Fig. S3: Dependence of PL of the APbBr<sub>3</sub> NCs on reaction temperature.

Fig. S4: Dependence of PLQY and TEM images of the NCs on reaction temperature.

Fig. S5: Batch-to-batch variation of PLQY of the prepared CsPbBr<sub>3</sub> NCs.

Fig. S6: Bright field TEM images, PXRD patterns and UV-Vis absorption spectra of the APbCl<sub>3</sub> NCs.

Fig. S7: Additional TEM images and size distribution histogram of the APbBr<sub>3</sub> NCs.

Fig. S8: Additional TEM images of the APbCl<sub>3</sub> NCs.

Fig. S9: High resolution TEM images of the CsPbCl<sub>3</sub> and CsPbBr<sub>3</sub> NCs.

Fig. S10: High resolution TEM images of FAPbBr<sub>3</sub> NCs.

Fig. S11: Dependence of PLQY of the CsPbCl<sub>3</sub> NCs on Pb:Cl molar precursor ratios.

Fig. S12: UV-Vis absorption and PXRD pattern of the MAPbCl<sub>3</sub> NCs prepared with Pb:Cl molar precursor ratio of 1:3 and 1:1.5.

Fig. S13: PL decay profiles of the MAPbX<sub>3</sub> and FAPbX<sub>3</sub> (X= Cl and Br) NCs.

Fig. S14: PL decay characteristics of the CsPbX<sub>3</sub> NCs prepared with Pb:X molar ratio of 1:2.

Fig. S15: TA spectra and bleach recovery kinetics of the MAPbCl<sub>3</sub> and FAPbCl<sub>3</sub> NCs.

Fig. S16: PL decay profiles of the mixed-halide NCs.

Fig. S17: PL spectra of all mixed-halide NCs directly prepared by our method.

Fig. S18: Bright field TEM images of all mixed-halide NCs.

Fig. S19: PXRD patterns of the mixed-halide NCs.

Fig. S20: PL spectra and digital images of the samples obtained upon post-synthetic reversible halide exchange reactions.

Fig. S21: Post-synthetic cation exchange at A-site on CsPbBr<sub>3</sub> NCs.

Fig. S22: Air- and photo-stability data of the CsPbBr<sub>3</sub> NCs.

Fig. S23: Air- and photo-stability data of the MAPbBr<sub>3</sub> NCs.

Fig. S24: Air- and photo-stability data of the FAPbBr<sub>3</sub> NCs.

Fig. S25: TEM images of the MAPbBr<sub>3</sub> and FAPbBr<sub>3</sub> NCs stored under ambient condition for 80 days.

Fig. S26: Air- and photo-stability data of the CsPbCl<sub>3</sub> NCs.

Fig. S27: Air-stability of the CsPbCl<sub>1.5</sub>Br<sub>1.5</sub> and CsPbBr<sub>1.5</sub>I<sub>1.5</sub> NCs.

Fig. S28: Stability of MAPbCl<sub>3</sub> and FAPbCl<sub>3</sub> NCs under ambient condition.

Fig. S29: EDX spectra and atomic % ratio of the CsPbBr<sub>3</sub>(II) NCs.

Fig. S30: Stability of the CsPbBr<sub>3</sub>(II) NCs under ambient condition.

Fig. S31: XPS survey spectra of the CsPbBr<sub>3</sub> NCs.

Fig. S32: Core-level Br 3d XPS spectra of the CsPbBr<sub>3</sub> and CsPbBr<sub>3</sub>(II) NCs.

Fig. S33: EDX spectra and corresponding atomic % ratios of CsPbCl<sub>3</sub> and CsPbCl<sub>3</sub>(II) NCs.

Fig. S34: PXRD pattern of CsPbCl<sub>3</sub> NCs prepared with Pb:Cl ratio of 1:9.

Fig. S35: <sup>1</sup>H NMR spectra of purified CsPbBr<sub>3</sub>(II) NCs in CDCl<sub>3</sub>.

Fig. S36: FTIR spectra of the CsPbBr<sub>3</sub> NCs washed with MeOAc.

**Tables:** Table S1: Optical properties of the APbX<sub>3</sub> NCs on reaction temperature and precursor Pb:X ratio.

Table S2: Comparison of PLQY of the CsPbCl<sub>3</sub> NCs obtained directly by different methods.

Table S3: PL decay parameters of the APbX<sub>3</sub> NCs.

Table S4: Kinetic parameters of the CsPbX<sub>3</sub> NCs obtained from fs-TA studies.

Table S5: Amount of different halide precursors used for direct synthesis of mixed-halide NCs.

Table S6: Optical properties of the mixed-halide NCs.

Table S7: Comparison of the optical properties of mixed-halide NCs with the literature data.

Table S8: PL decay parameters of the mixed-halide NCs.

Table S9: Comparison of the optical properties and stability of APbX<sub>3</sub> NCs with literature data.  
Table S10: Advantages and disadvantages of DXDMH and some other popular halide precursors.  
Table S11: Atomic % ratios calculated from XPS measurements.  
Table S12: Atomic % ratio of CsPbCl<sub>3</sub> NCs with different Pb:Cl ratios obtained from EDX.

## Experimental section

**Chemicals:** Caesium carbonate (Cs<sub>2</sub>CO<sub>3</sub>, 99.9%), lead oxide (PbO, 99.999%, trace metals basis), formamidinium acetate (99%), 1,3-dichloro-5,5-dimethylhydantoin (DCDMH, 68%), 1,3-diiodo-5,5-dimethylhydantoin (DIDMH, >96%), octadecene (ODE, 90%), oleic acid (OA, technical grade, 90%), oleylamine (OAm, technical grade, 70%), toluene (anhydrous, 99.8%), methyl acetate (MeOAc, anhydrous, 99.5%) and chloroform-d (CDCl<sub>3</sub>, 99.8 atom% D) were purchased from Sigma-Aldrich. Methylamine (2M solution in tetrahydrofuran) and 1,3-dibromo-5,5-dimethylhydantoin (DBDMH, 98%) was purchased from TCI chemicals and Lancaster, respectively. Hexane (HPLC & Spectroscopy) and acetonitrile (ACN, dried) were brought from Finar and Merck Chemicals, respectively. All chemicals including the solvents were used without any further purification.

**Synthesis of the APbX<sub>3</sub> NCs:** Our three-precursor hot injection method of synthesis involves two steps. The first step was preparation of the oleate salt of the ‘A’ cation, which was injected to a solution containing lead and halide precursors at a particular temperature for the preparation of APbX<sub>3</sub> NCs.

**Preparation of the oleates: Caesium-oleate (Cs-oleate):** Cs-oleate was prepared at high temperature by following a reported procedure of Kovalenko and co-workers with some modifications.<sup>1</sup> In short, 0.16 g of Cs<sub>2</sub>CO<sub>3</sub>, 6 mL of ODE and 0.55 mL of OA were loaded in a 50 mL two-neck round-bottom (RB) flask, degassed for 5 min at room-temperature and heated under vacuum at 120°C for 1 h. Then the reaction mixture was kept under N<sub>2</sub> atmosphere at this

temperature until all  $\text{Cs}_2\text{CO}_3$  reacted with OA forming a transparent solution of Cs-oleate. To avoid precipitation at room-temperature, it was preheated at  $120^\circ\text{C}$  before use.

**Formamidineum-oleate (FA-oleate):** FA-oleate was also prepared by a reported method with some modifications.<sup>2</sup> In brief, 0.26 g of FA-acetate was loaded into a 50 mL double-neck RB containing 10 mL of OA (for  $\text{FAPbCl}_3$  NCs, a mixture of 4 mL OA and 6 mL ODE is taken) and then degassed for 5 min at room-temperature under vacuum. It was then heated under  $\text{N}_2$  atmosphere at  $120^\circ\text{C}$  until the entire solution becomes clear. The resultant solution was finally dried under vacuum for 5 min by lowering the reaction temperature to  $45\text{--}50^\circ\text{C}$ .

**Methylammonium-oleate (MA-oleate):** Preparation of MA-oleate was quite straightforward and it did not require high temperature. It was obtained by thoroughly mixing 250  $\mu\text{L}$  methylamine (2M in tetrahydrofuran) and 2.5 mL of OA at room-temperature.

**Preparation and purification of the  $\text{CsPbX}_3$  NCs:** In a 50 mL double-neck RB, 0.564 mmol of DBDMH (for  $\text{CsPbBr}_3$  NCs) or DCDMH (for  $\text{CsPbCl}_3$  NCs) and 0.188 mmol of PbO was loaded along with 2 mL each of OA and OAm as capping ligands and 5 mL ODE as solvent. The entire mixture was degassed under vacuum at RT for 5 min to remove possible moisture in the mixtures and then heated at  $130^\circ\text{C}$  under  $\text{N}_2$  environment until a clear solution formed. The reaction temperature was then increased to  $210^\circ\text{C}$  and 0.5 mL preheated (at  $120^\circ\text{C}$ ) Cs-oleate solution was swiftly injected into the reaction medium containing lead and halide precursors. After few seconds ( $\sim 20$  sec for  $\text{CsPbBr}_3$  NCs and 30 sec for  $\text{CsPbCl}_3$  NCs) the reaction system was rapidly cooled in an ice-water bath.

The mixed-halide  $\text{CsPb}(\text{Cl}/\text{Br})_3$  and  $\text{CsPb}(\text{Br}/\text{I})_3$  NCs were also prepared following a similar procedure employing two different halide precursors. The exact amount of halide precursors used for the synthesis of different systems is listed in Table S5 for convenience.

*Purification:* The crude reaction product was cooled down to RT, 4 mL hexane was added to it and then centrifuged at 7k rpm for 8 min. The supernatant containing possible unreacted precursors (if any) and solvent was drained out and the precipitate was then dispersed in hexane. After 15 min, the colloidal dispersion was again centrifuged at 7k rpm for 5 min to remove larger particles and possible aggregates and the supernatant solution was collected for further studies. The purification procedure is quite different only for the mixed-halide CsPbBrI<sub>2</sub> NCs. In this case, the crude reaction mixture was centrifuged at 3k rpm for 10 min and the precipitate containing larger particles and possible aggregates was removed. Then anhydrous MeOAc as anti-solvent was added drop-wise into the supernatant until turbidity appeared and then quickly centrifuged at 7k rpm for 3 min. The supernatant was discarded, and the precipitate was finally dispersed in hexane for further studies.

**MAPbX<sub>3</sub> NCs:** In brief, 0.188 mmol of PbO and 0.564/0.282 mmol of DBDMH/DCEMH for the synthesis of MAPbBr<sub>3</sub>/MAPbCl<sub>3</sub> NCs were loaded into a double-neck 50 mL RB along with 1.5 mL of OA and 0.5 mL of OAm (for MAPbBr<sub>3</sub>) or 2 mL of OA and 0.4 mL of OAm (for MAPbCl<sub>3</sub>) in 5 mL of ODE. The reaction mixture was degassed at RT under vacuum for 5 min and after complete solubilization of the reaction mixture at 130°C, the temperature was set to 165°C (for MAPbBr<sub>3</sub>) or 95°C (for MAPbCl<sub>3</sub>) under N<sub>2</sub> atmosphere. When the reaction temperature reached the desired temperature, MA-oleate (250 µL of methylamine in 2.5 mL of OA) was swiftly injected into reaction medium, followed by rapid quenching (after 20 sec for MAPbCl<sub>3</sub>) of the reaction mixture in an ice-water bath to stop the growth of the NCs.

*Purification:* For MAPbBr<sub>3</sub> NCs, the crude product was brought to RT, 3 mL of MeOAc was added to it and centrifuged at 7k rpm for 6 min. The supernatant containing unreacted precursors and ODE was discarded and the precipitate was dispersed in hexane. After 15 min, it was again

centrifuged at 7k rpm for 5 min and the supernatant was collected for further studies. For MAPbCl<sub>3</sub> NCs, when the crude product reached RT, it was centrifuged at 12k rpm for 7 min after addition of equal volume of MeOAc into it. The supernatant was discarded, and the precipitate was dispersed in hexane for further experiments.

**FAPbX<sub>3</sub> NCs:** The synthetic strategy and purification procedure for FAPbX<sub>3</sub> NCs was quite similar to that employed for the MAPbX<sub>3</sub> NCs described above. The ligand ratio and reaction temperature used for the preparation of these NCs are listed in Table 1. The only difference in this case was that instead of MA-oleate, 2.5 mL of FA-oleate solution preheated at 100°C was swiftly injected into the reaction medium at the desired temperature for formation of the FAPbX<sub>3</sub> NCs.

**RT halide exchange reaction:** The halide exchange reactions were performed under ambient condition on colloidal dispersion of pre-synthesized CsPbBr<sub>3</sub> NCs. For this purpose, a saturated solution of DCDMH/DIDMH was prepared in hexane containing OAm and OA. Very small amount (few  $\mu$ L) of the solutions was mixed with a dilute colloidal CsPbBr<sub>3</sub> NCs and shaken vigorously for the anion exchange reactions. An instant reversible change in emission color under UV light (green-to-blue for DCDMH and green-to-red for DIDMH) indicated successful halide exchange reactions.

**RT A-site cation exchange:** For the post-synthetic cation exchange reaction at RT, we have first diluted 100  $\mu$ L of FA-oleate solution in 1 mL hexane and added to CsPbBr<sub>3</sub> NCs dispersion of few mM concentrations under stirring and monitored the absorption and PL spectra with different time interval by pipetting out small aliquots from the reaction mixture.

## Characterization of samples

**Transmission Electron Microscopy (TEM) Measurement:** TEM measurements were carried out using Tecnai G2 FE1 F12 transmission electron microscope, which was operated at an accelerating voltage of 200 kV. The samples for this study were prepared by drop-casting a diluted colloidal solution of the NCs on a carbon coated copper-grid and dried overnight under vacuum.

**Powder X-ray diffraction (PXRD) Measurement:** PXRD patterns of the samples (as thin-films) were recorded on a X-ray diffractometer (Bruker AXS D8) using Cu-K $\alpha$  X-ray radiation ( $\lambda = 1.5406 \text{ \AA}$ ). The samples were prepared by drop-casting highly concentrated colloidal solutions of the NCs on a clean thin quartz glass plate, which was vacuum-dried for 48 h before measurements.

**Energy dispersive X-ray (EDX) Measurement:** EDX spectra were recorded using Oxford Instruments X-Max<sup>N</sup> SDD (50 mm<sup>2</sup>) system and INCA analysis software. The samples for this measurement were prepared by drop-casting a colloidal solution of the NCs on thin clean quartz plate and they were dried under vacuum for 24h.

**X-ray Photoelectron Spectroscopy (XPS) Measurements:** XPS measurements were performed in a Thermo Scientific K-Alpha spectrometer equipped with micro-focused monochromatic X-ray source (Al K $\alpha$ , spot size  $\sim 400 \text{ }\mu\text{m}$ ) operating at 70 W. The energy resolution of the spectrometer was set at 0.5 eV at pass energy of 50 eV and  $5 \times 10^{-5}$  torr base pressure was maintained at the analysis chamber. Low energy electrons from the flood gun were used for charge compensation. An optimum concentration of the NCs was drop-casted onto a clean quartz glass plate for the XPS measurements and kept under vacuum overnight.

**Fourier-Transformed Infrared (FTIR) Measurement:** FTIR study was performed using Bruker Tensor II spectrometer. A drop of concentrated colloidal solution of purified CsPbBr<sub>3</sub> NCs was used for this study.

**Nuclear Magnetic Resonance (NMR) Measurement:** <sup>1</sup>H NMR spectra were recorded by using a NMR (Bruker Avance) spectrometer operating at a frequency of 400 MHz at 25°C. For the preparation of NMR samples, the as-synthesized crude CsPbBr<sub>3</sub> NCs solution in ODE was first centrifuged at 7k rpm for 8 min and the precipitate was dispersed in dried hexane. Then dried MeOAc was added to the NCs dispersion in 1:1 volume ratio, centrifuged at 7k rpm for 5 min and the supernatant was discarded. The precipitate was then dispersed in CDCl<sub>3</sub>. A clear solution was used for measuring the <sup>1</sup>H NMR data.

**Steady-state Optical Measurements:** UV-Vis absorption and photoluminescence (PL) measurements were carried out using spectrophotometer (Cary100, Varian) and spectrofluorimeter (FlouroLog-3, Horiba Jobin Yvon), respectively. For these measurements, a dilute colloidal solution of the NCs (optical density of < 0.05 at the excitation wavelengths in 1 cm path length cuvette) was used.

**Time-resolved PL Measurement:** These measurements were carried out using a time-correlated single-photon counting (TCSPC) spectrometer (Horiba JobinYvon IBH). The excitation sources were diode lasers emitting at 376/405/481 nm and the detector was an MCP photomultiplier (Hamamatsu R3809U-50). The instrument response function (IRF) of the setup was ~ 61 ps. The decay curves were analyzed by nonlinear least-squares iteration procedure using IBH DAS6 (version 2.2) decay analysis software. The quality of the fits was assessed by the  $\chi^2$  values and distribution of the residuals. Further details on the setup can be found elsewhere.<sup>3</sup>

**Ultrafast Transient Absorption (TA) Measurement:** These studies were carried out using a setup comprising femtosecond laser sources from Spectra-Physics, USA and spectrometer from CDP systems, Russia. The seed laser output (800 nm, <100 fs, 80 MHz) was directed into a Ti:sapphire regenerative amplifier, which was pumped by the second-harmonic (532 nm) of Nd:YLF laser. A major portion (80%) of the output of the amplifier (800 nm, <120 fs, 1 kHz) was passed through an optical parametric amplifier to generate pump wavelengths for the excitation of APbX<sub>3</sub> NCs. The remaining portion of the output was passed through a variable optical delay line of 4 ns and then directed to a rotating CaF<sub>2</sub> crystal to generate the white probe light. The probe beam was divided into two parts to use as signal and reference beams. The pump and signal beams were focused onto a rotating sample cell maintaining a collinear geometry to obtain a better spatial overlap of the two beams. The transmitted signal and reference beams were received by multichannel photodiode array through a polychromator and further processed to record difference in absorbances ( $\Delta A$ ) as a function of wavelength and pump-probe delay. All TA measurements were performed under low pump density ( $J_p = 4-5 \mu\text{J}/\text{cm}^2$ ) to avoid non-linear optical processes. All TA spectra were chirp-corrected and instrumental resolution was found to be 80-100 fs.<sup>4</sup>

**Photoluminescence Quantum Yield (PLQY) Estimation:** PLQY of all the samples was calculated using the following equation:

$$QY_S = QY_R \times (I_S/I_R) \times (OD_R/OD_S) \times (\eta_S/\eta_R)^2$$

where, I represents the integrated area under the PL spectrum, OD and  $\eta$  represent optical density at the excitation wavelength and refractive index of the medium, respectively. S and R correspond to sample (i.e. the NCs) and reference, respectively. 9,10-diphenylanthracene (PLQY = 0.93 in ethanol),<sup>5</sup> coumarin-153 (PLQY = 0.54 in ethanol)<sup>6</sup> and rhodamine 6G (PLQY = 0.95

in water)<sup>7</sup> were used as reference estimation of PLQY of blue-violet-emitting APbCl<sub>3</sub> and CsPb(Cl/Br)<sub>3</sub> NCs, green-emitting APbBr<sub>3</sub> NCs, yellow-orange-emitting CsPb(Br/I)<sub>3</sub> NCs, respectively.

**Photostability and Water Treatment Studies:** Photostability of dilute colloidal dispersion of the APbX<sub>3</sub> NCs was studied under continuous illumination of 365 nm UV light (8W) at room-temperature and relative-humidity of 50-60%. For this experiment, a small volume of OA and OAm (30  $\mu$ L each) was mixed with the purified NCs dispersion in hexane and a small portion of it was diluted in 2.5 mL hexane in a cuvette and placed under the UV light. Then PL intensity of the sample was monitored time-to-time to determine the remnant PL of the NCs. In case of water treatment, additionally, 1 mL of distilled water was put on 2.5 mL of dilute colloidal dispersion of the CsPbBr<sub>3</sub> NCs (in cuvette) and vigorously shaken before starting the experiment.

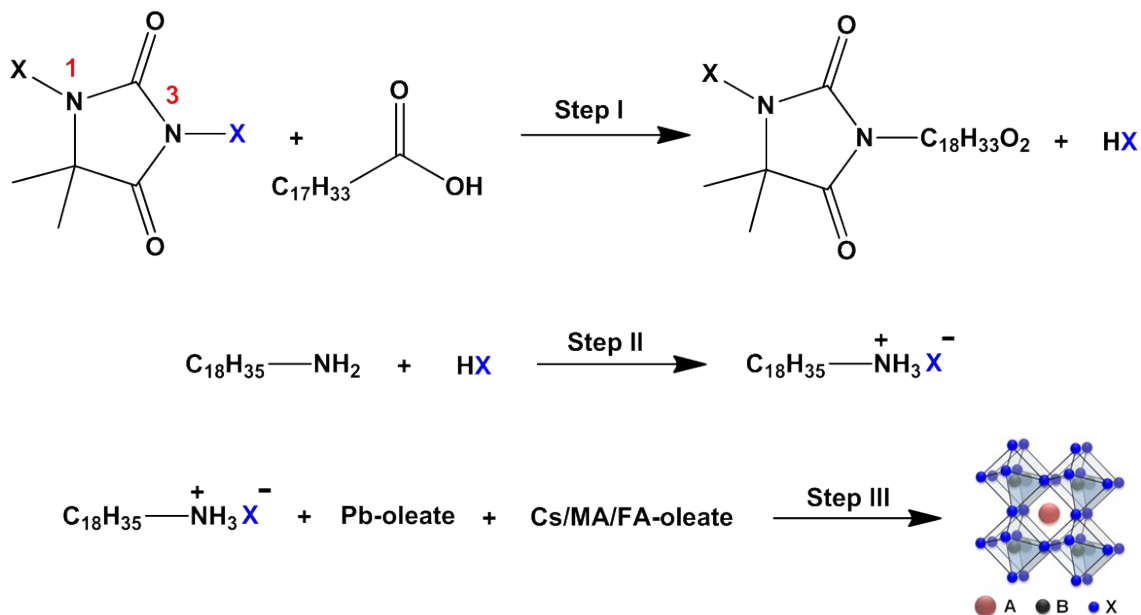

**Scheme S1** Schematic representation of the steps involved in DXDMH-mediated hot injection synthesis of the APbX<sub>3</sub> NCs.

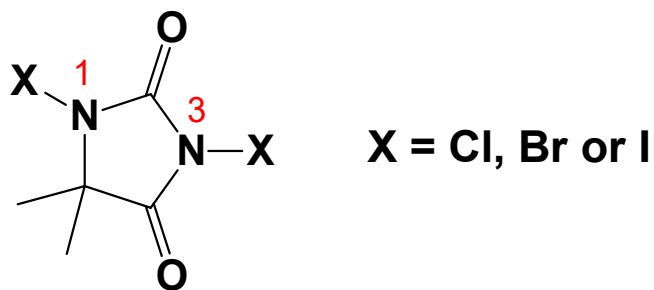

1,3-dihalo-5,5-dimethylhydantoin (DXDMH)

**Fig. S1** Chemical structure of 1,3-dihalo-5,5-dimethylhydantoin (DXDMH). ‘X’ represents the halogen atom.

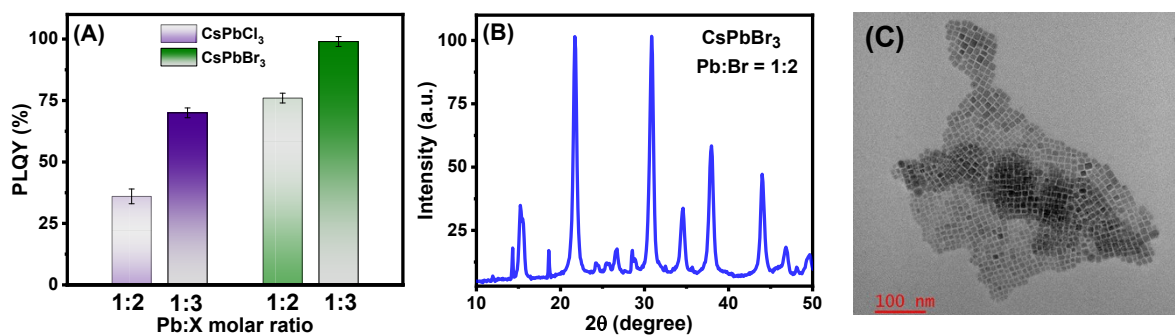

**Fig. S2** (A) Dependence of PLQY of the CsPbCl<sub>3</sub> and CsPbBr<sub>3</sub> NCs (obtained at 210°C) on the Pb:X precursor molar ratio. (B) PXRD pattern and (C) TEM image of the samples of CsPbBr<sub>3</sub>(II) NCs (prepared using a Pb:Br molar ratio of 1:2). The scale bar is 100 nm.

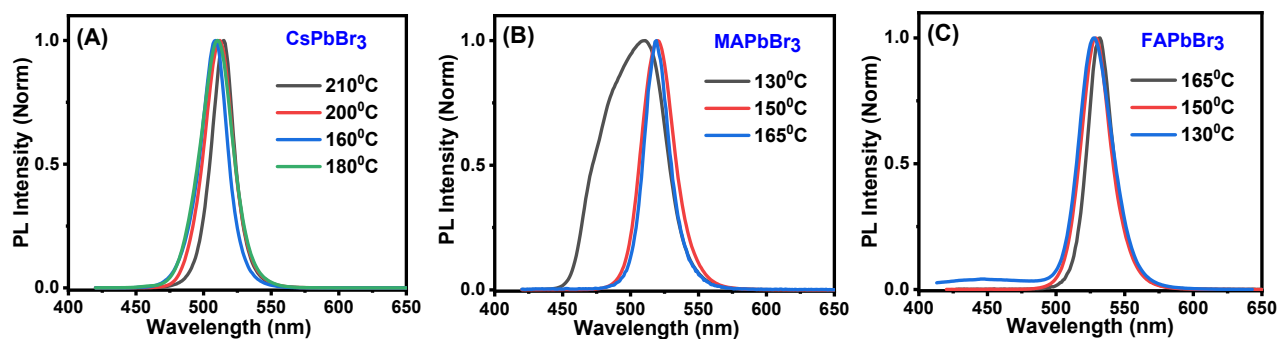

**Fig. S3** PL spectra (normalized) of the (A) CsPbBr<sub>3</sub>, (B) MAPbBr<sub>3</sub> and (C) FAPbBr<sub>3</sub> NCs obtained at different reaction temperature.

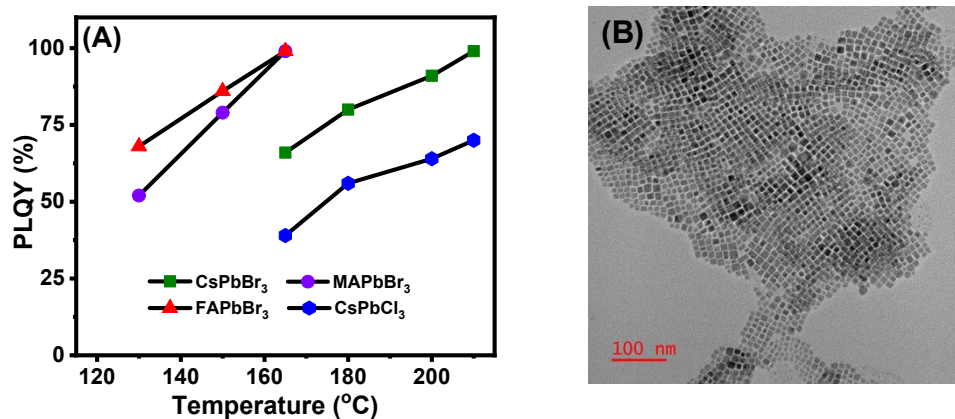

**Fig. S4** (A) PLQY of the NCs as a function of reaction temperature. (B) TEM image of the CsPbBr<sub>3</sub> NCs prepared at 180°C. The scale bar is 100 nm.

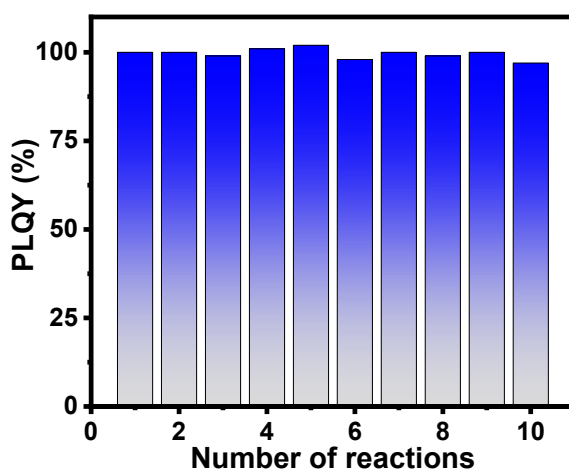

**Fig. S5** PLQY of the CsPbBr<sub>3</sub> NCs of different batches highlighting reproducibility of our method.

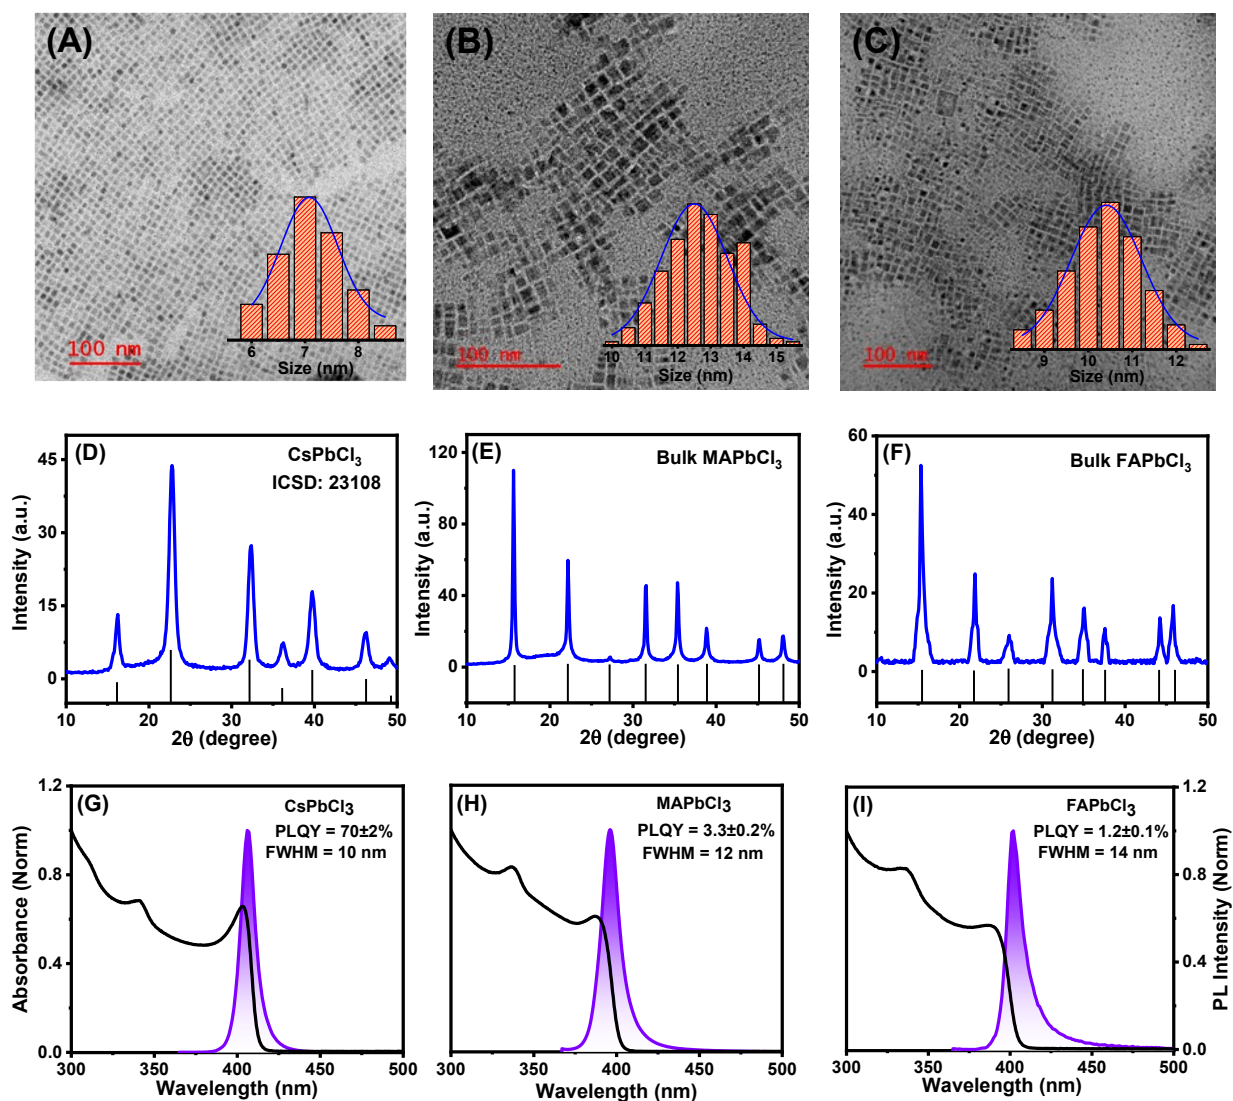

**Fig. S6** Bright-field TEM images of (A) CsPbCl<sub>3</sub>, (B) MAPbCl<sub>3</sub> and (C) FAPbCl<sub>3</sub> NCs. Inset shows size distribution histogram of the respective NCs. The scale bar is 100 nm for all samples. PXRD patterns of (D) CsPbCl<sub>3</sub>, (E) MAPbCl<sub>3</sub> and (F) FAPbCl<sub>3</sub> NCs with reference patterns obtained from their cubic bulk counterparts. UV-Vis absorption and PL spectra of (G) CsPbCl<sub>3</sub>, (H) MAPbCl<sub>3</sub> and (I) FAPbCl<sub>3</sub> NCs. The samples were excited at 400 nm.

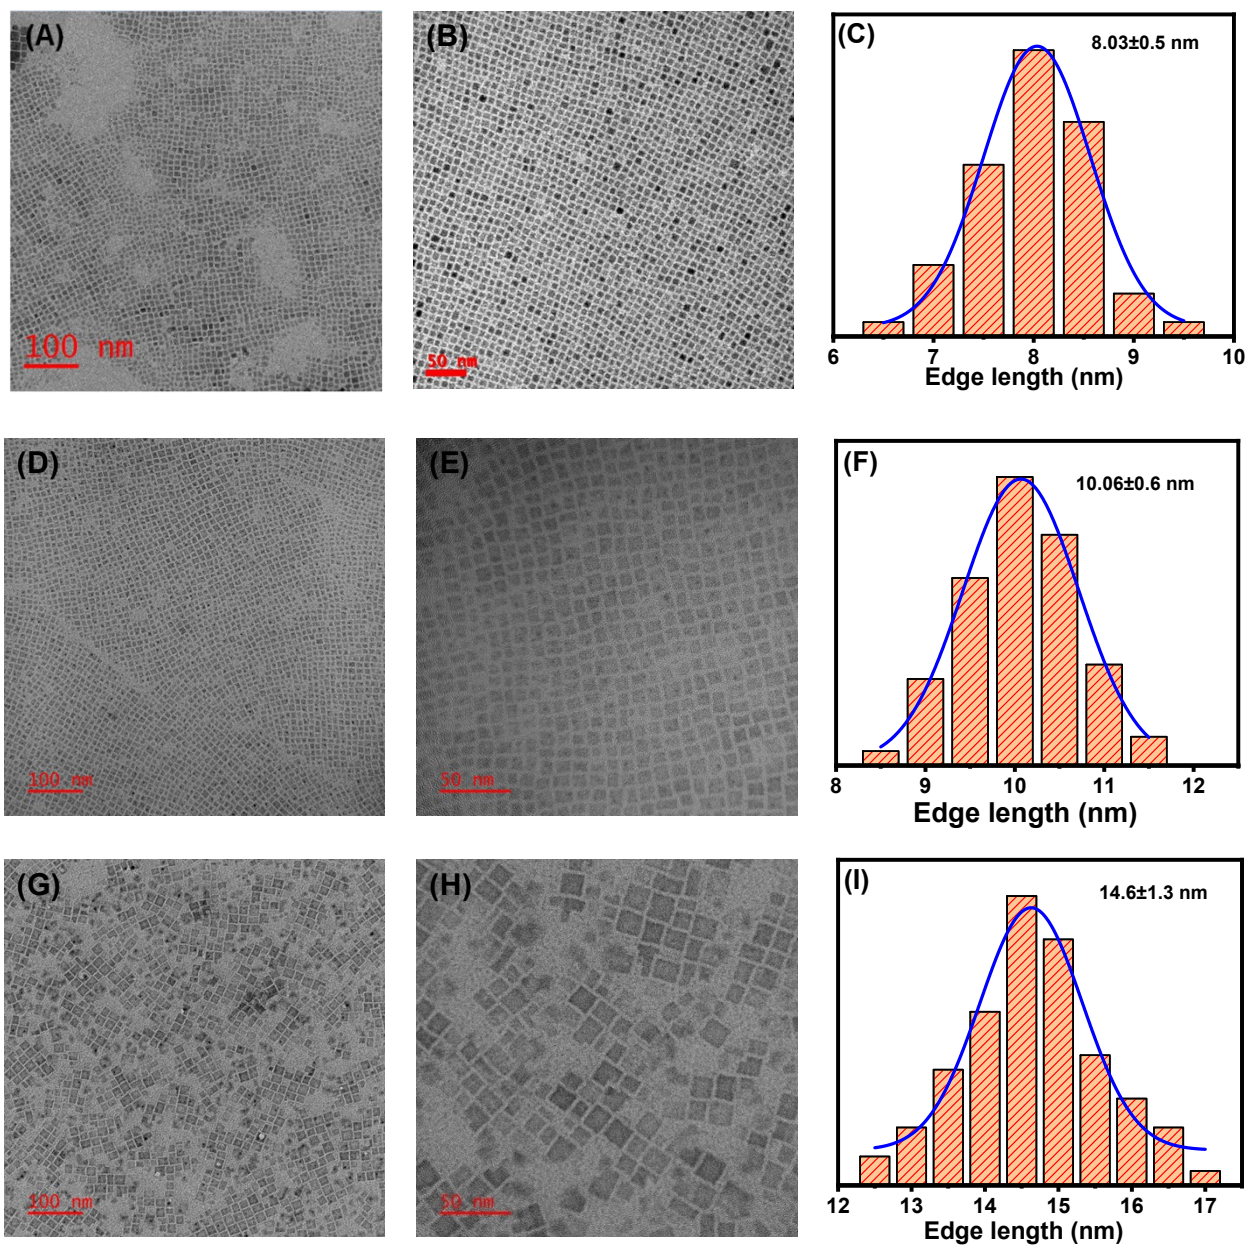

**Fig. S7** Additional bright-field TEM images and size distribution histogram of (A-C) CsPbBr<sub>3</sub>, (D-F) MAPbBr<sub>3</sub> and (G-I) FAPbBr<sub>3</sub> NCs. The scale bar is indicated at the bottom left corner of each image.

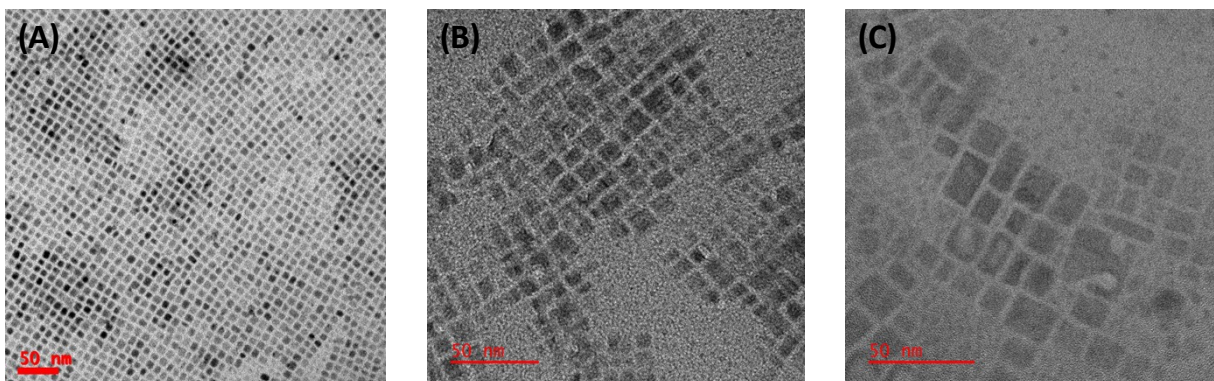

**Fig. S8** Additional bright-field TEM images of (A)  $\text{CsPbCl}_3$ , (B)  $\text{MAPbCl}_3$  and (C)  $\text{FAPbCl}_3$  NCs. The scale bar is 50 nm in all cases.

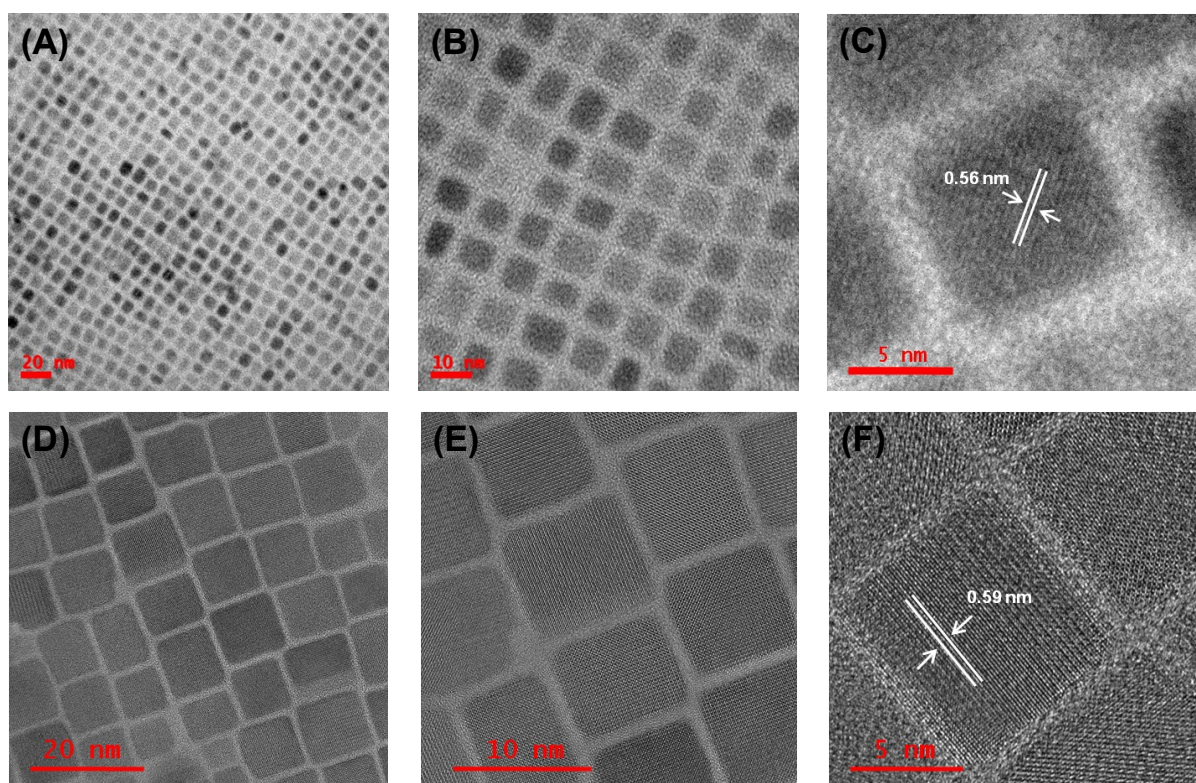

**Fig. S9** High-resolution TEM images of (A-C)  $\text{CsPbCl}_3$  and (D-F)  $\text{CsPbBr}_3$  NCs. The interplanar spacing ( $d_{100}$ ) corresponding to the (100) planes of the NCs is also measured and shown in Figure C and F. The scale bar is shown in the bottom-left corner of each image.

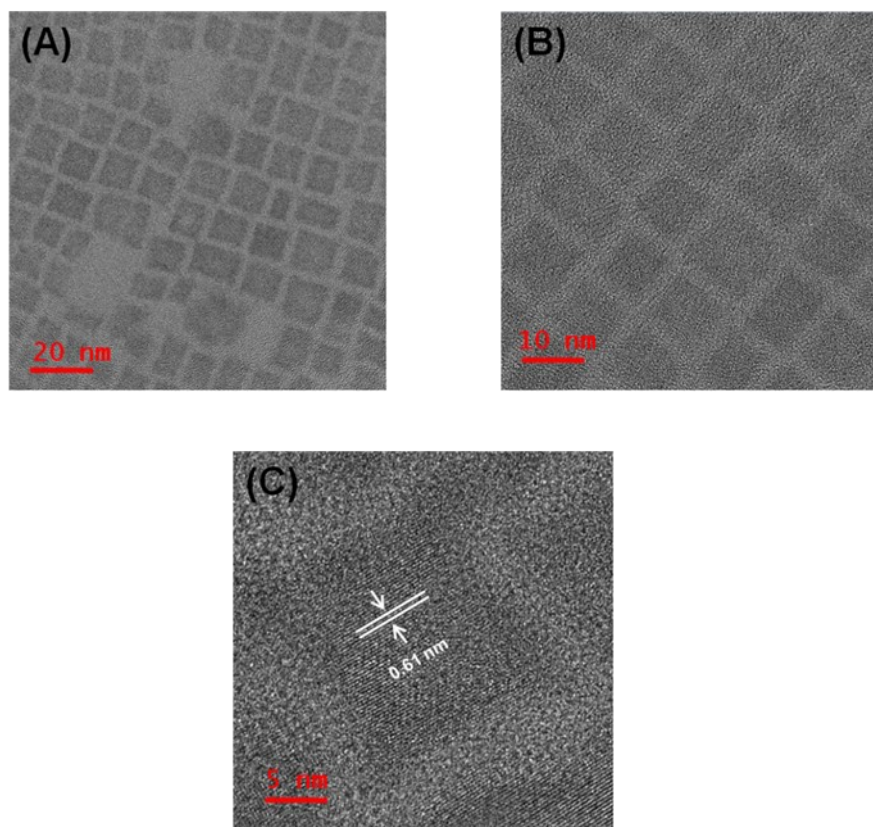

**Fig. S10** (A-C) High-resolution TEM images of FAPbBr<sub>3</sub> NCs. The inter-planar spacing ( $d_{100}$ ) corresponding to the (100) planes of the NCs is also measured and shown in Figure C. The scale bar is shown in the bottom-left corner of each image.

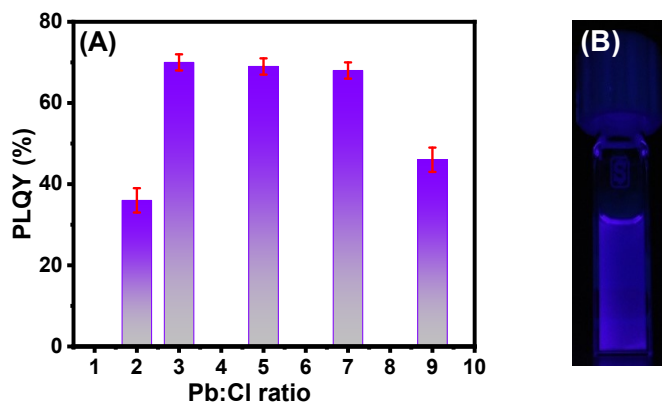

**Fig. S11** (A) Dependence of PLQY of the CsPbCl<sub>3</sub> NCs on the Pb:Cl molar precursor ratio. An excess amount of DCDMH is seen to have a detrimental effect on the optical properties of the NCs. (B) Digital image showing the PL of the CsPbCl<sub>3</sub> NCs obtained using Pb:Cl precursor molar ratio of 1:3.

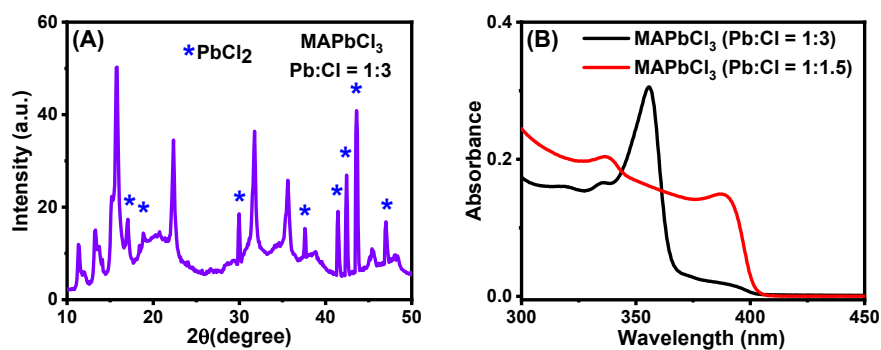

**Fig. S12** (A) PXRD pattern of the MAPbCl<sub>3</sub> NCs prepared using 1:3 ratio of Pb:Cl showing the additional diffraction peaks arising from undesired PbCl<sub>2</sub> by-product. (B) Absorption spectra of the MAPbCl<sub>3</sub> NCs prepared using Pb:Cl precursor ratio of 1:3 and 1:1.5.

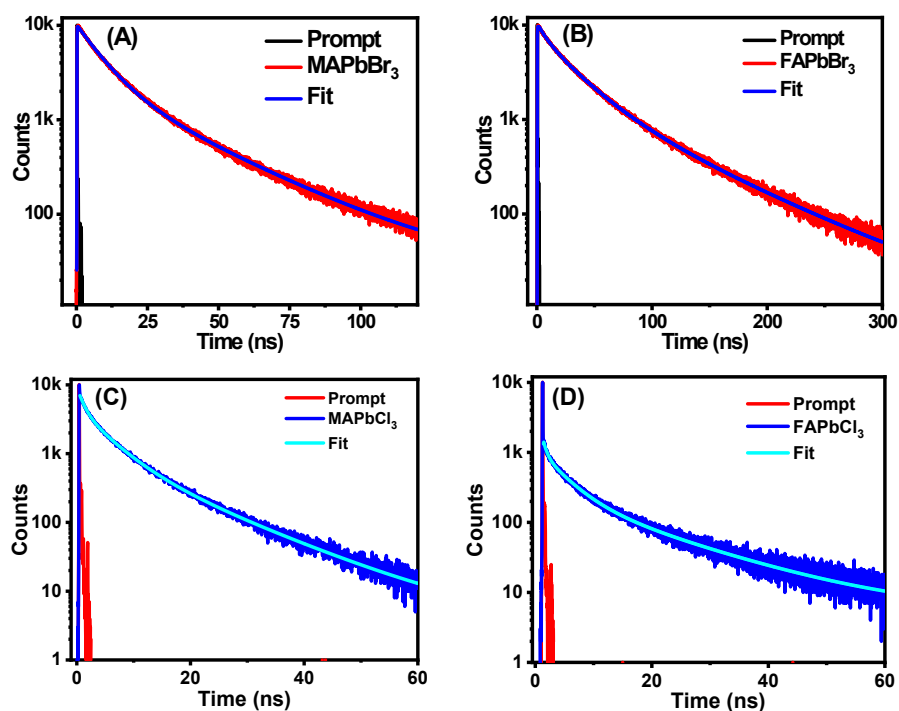

**Fig. S13** PL decay characteristics of the (A) MAPbBr<sub>3</sub>, (B) FAPbBr<sub>3</sub>, (C) MAPbCl<sub>3</sub> and (D) FAPbCl<sub>3</sub> NCs. The excitation wavelengths are 405 and 376 nm for the bromide- and chloride-based NCs, respectively and the PL was monitored at their respective PL peak maxima. The early (short) component of the PL decay of FAPbCl<sub>3</sub> NCs could not be measured accurately as this component is shorter than the time-resolution of our TCSPC setup (~63 ps).

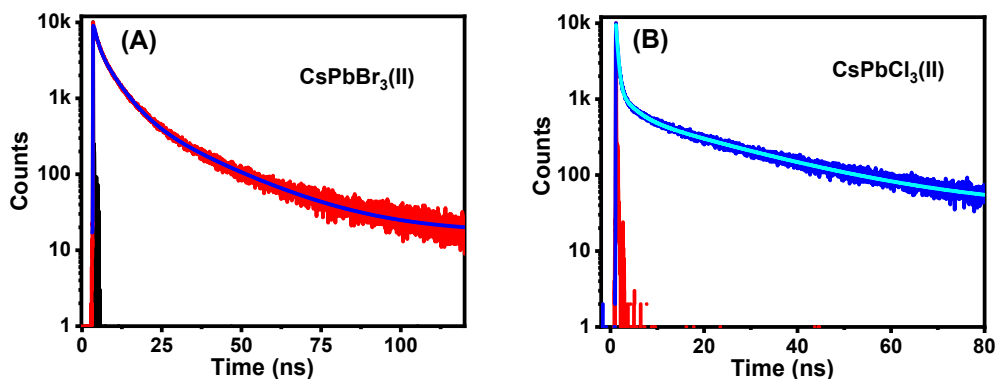

**Fig. S14** PL decay of (A) CsPbBr<sub>3</sub>(II) and (B) CsPbCl<sub>3</sub>(II) NCs (prepared using Pb:X precursor molar ratio of 1:2). These samples were excited at 404 and 376 nm, respectively and the decay was monitored at the corresponding PL maxima.

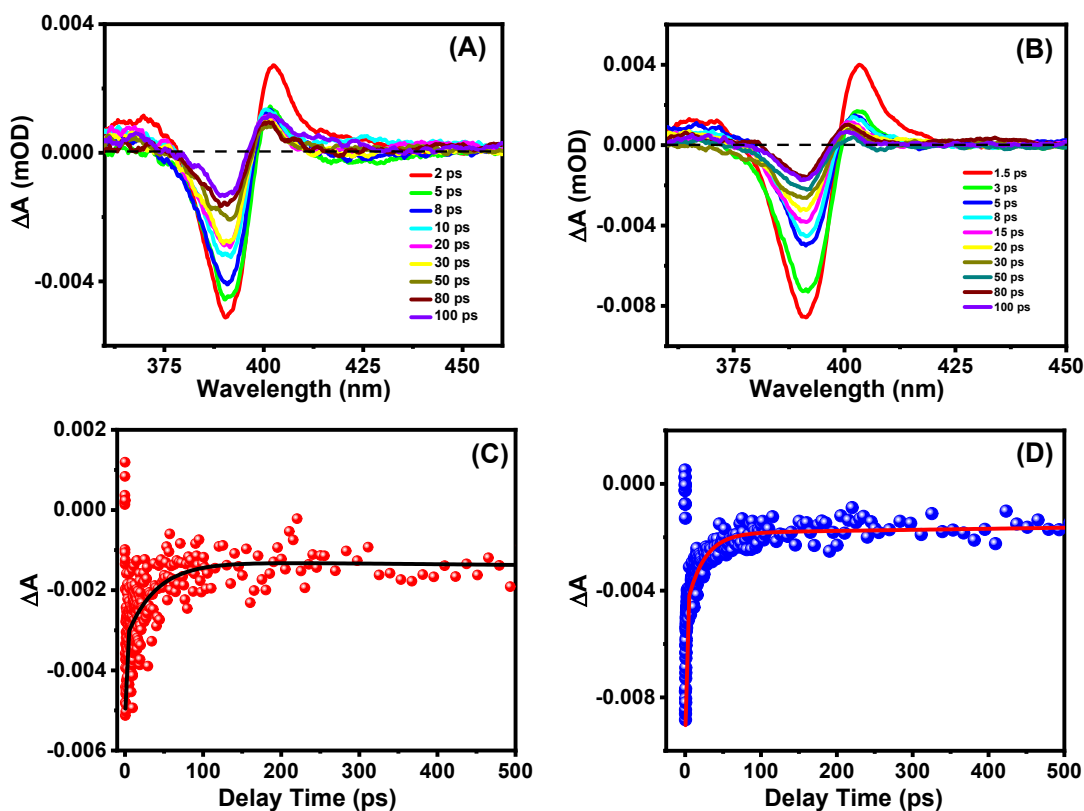

**Fig. S15** TA spectra of (A) MAPbCl<sub>3</sub> and (B) FAPbCl<sub>3</sub> NCs obtained upon excitation at 350 nm by a fs-pulsed laser. Bleach recovery dynamics of (C) MAPbCl<sub>3</sub> and (D) FAPbCl<sub>3</sub> NCs monitored at their respective bleach maxima.

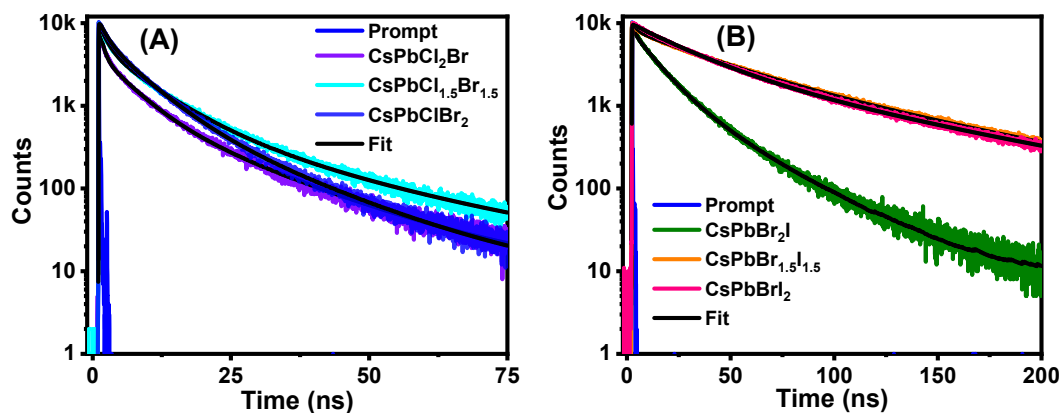

**Fig. S16** PL decay behavior of the (A) blue-emitting CsPb(Cl/Br)<sub>3</sub> and (B) yellow-orange-emitting CsPb(Br/I)<sub>3</sub> NCs. The samples were excited at 375 and 405 nm, respectively and the decay curves were monitored at their respective peak maxima.

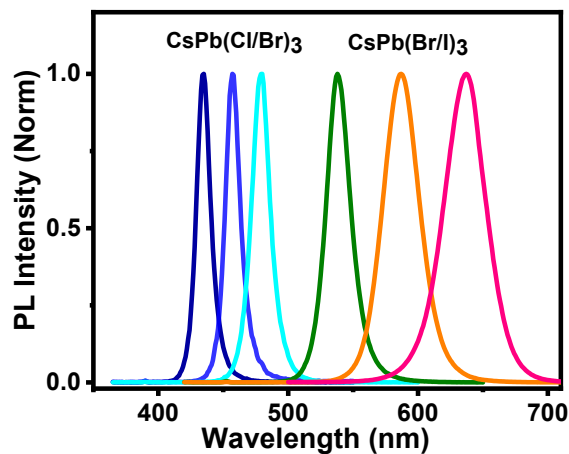

**Fig. S17** (A) PL spectra (normalized) of our samples of mixed-halide NCs covering a wide (431 to 635 nm) range of the visible region.

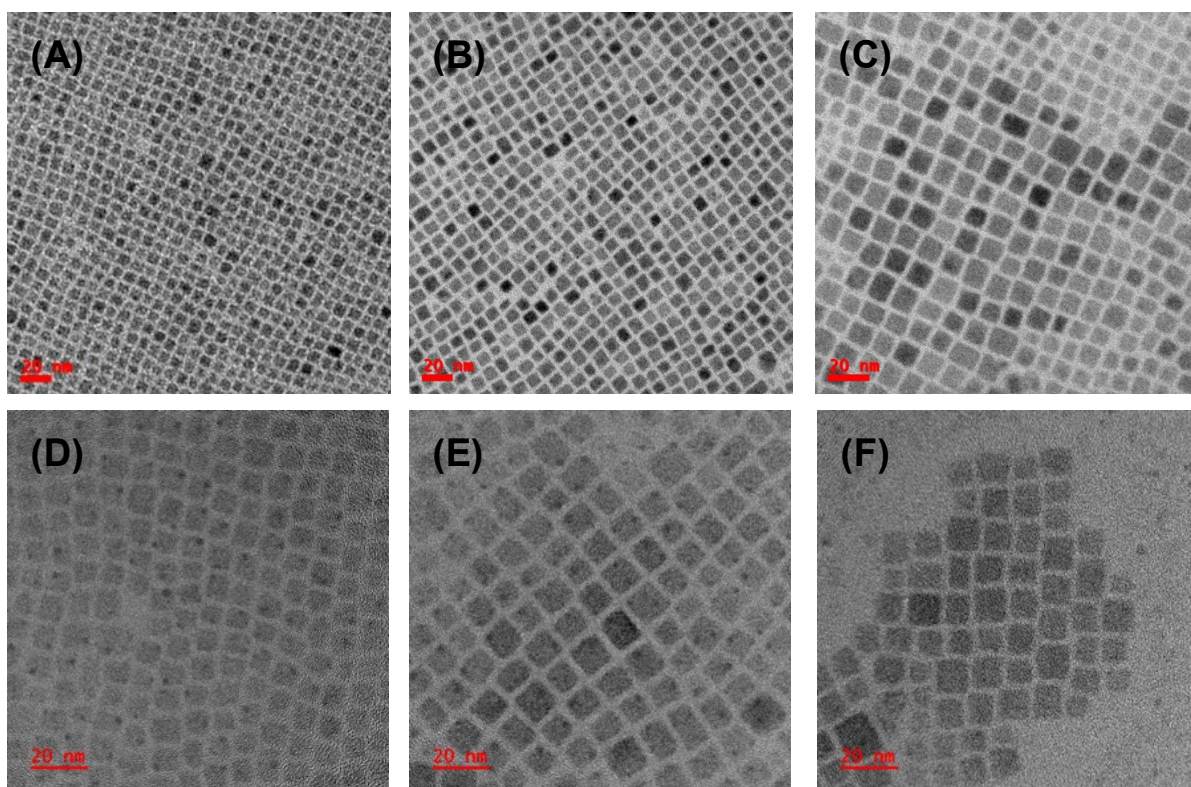

**Fig. S18** Bright field TEM images (A) CsPbCl<sub>2</sub>Br, (B) CsPbCl<sub>1.5</sub>Br<sub>1.5</sub>, (C) CsPbClBr<sub>2</sub>, (D) CsPbBr<sub>2</sub>I, (E) CsPbBr<sub>1.5</sub>I<sub>1.5</sub> and (F) CsPbBrI<sub>2</sub> NCs. The average edge lengths of the NCs are 6.9±1.4, 7.8±1.2, 9.3±2.2, 8.5±1.7, 9.4±2.5 and 10±2 nm, respectively.

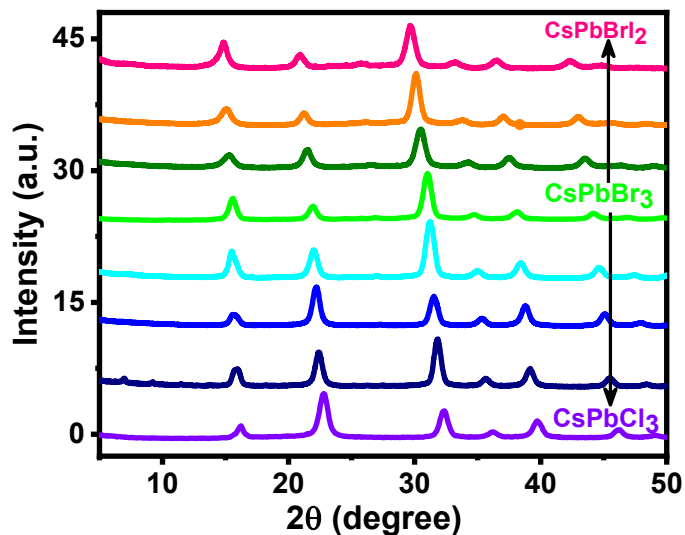

**Fig. S19** PXRD patterns of pristine CsPbCl<sub>3</sub>, CsPbBr<sub>3</sub> and the mixed-halide CsPb(Cl/Br)<sub>3</sub> and CsPb(Br/I)<sub>3</sub> NCs.

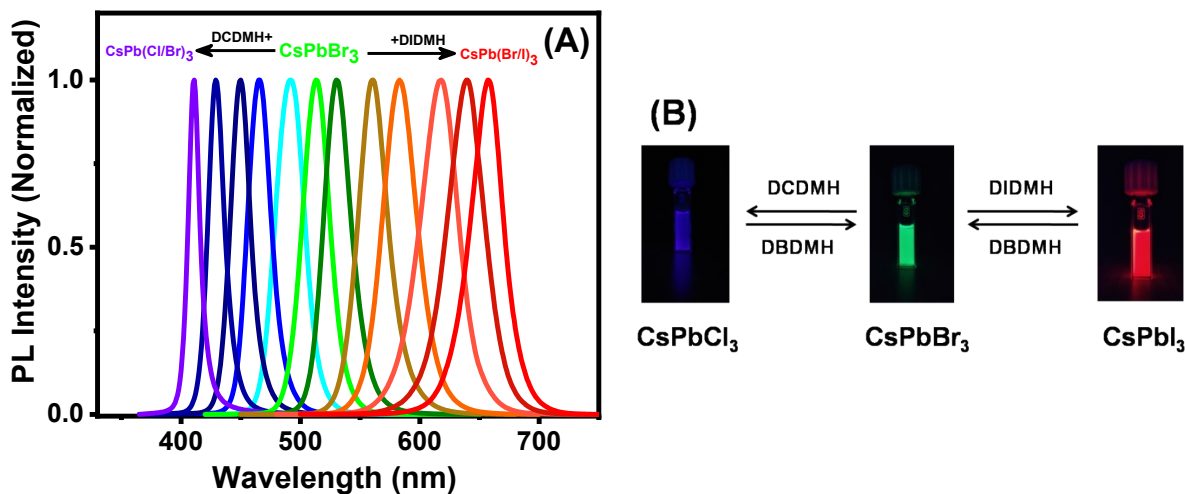

**Fig. S20** (A) Addition of a small quantity of DCDMH/DIDMH solution (in OAm and OA) to a colloidal dispersion of CsPbBr<sub>3</sub> NCs results in an instantaneous blue/red shift of the PL maximum in the range of ~410 to 660 nm due to room-temperature post-synthetic reversible halide exchange on the NCs. (B) Digital images of the CsPbBr<sub>3</sub> NCs before and after halide exchange reactions.

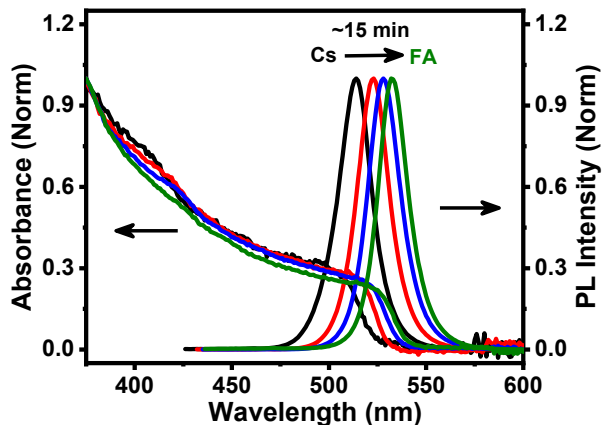

**Fig. S21** Post-synthetic cation exchange (A-site) on CsPbBr<sub>3</sub> NCs using FA-oleate solution at RT.

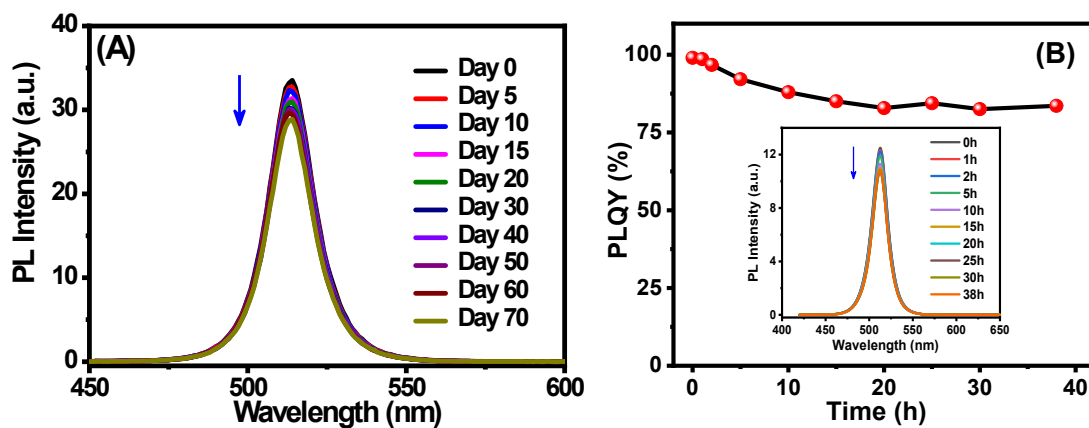

**Fig. S22** (A) Change in PL spectrum of the CsPbBr<sub>3</sub> NCs with time (stored under ambient conditions). (B) Photoinduced change in the PLQY of the CsPbBr<sub>3</sub> NCs under continuous illumination of 365 nm UV light (8W). Inset shows the PL spectra of the sample during the testing period.

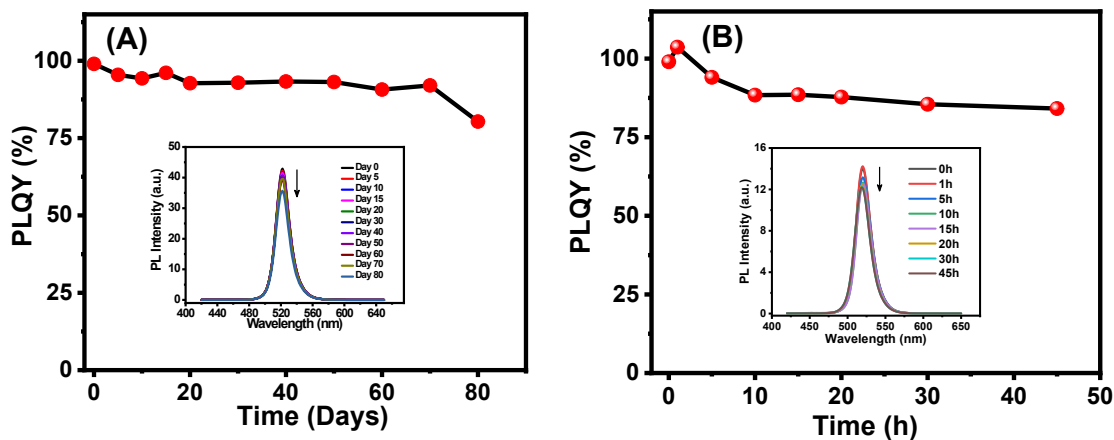

**Fig. S23** Change in PL spectrum of the MAPbBr<sub>3</sub> NCs with time (stored under ambient conditions). (B) Photoinduced change in the PLQY of the MAPbBr<sub>3</sub> NCs under continuous illumination of 365 nm UV light (8W). Inset shows the PL spectra of the sample during the testing period.

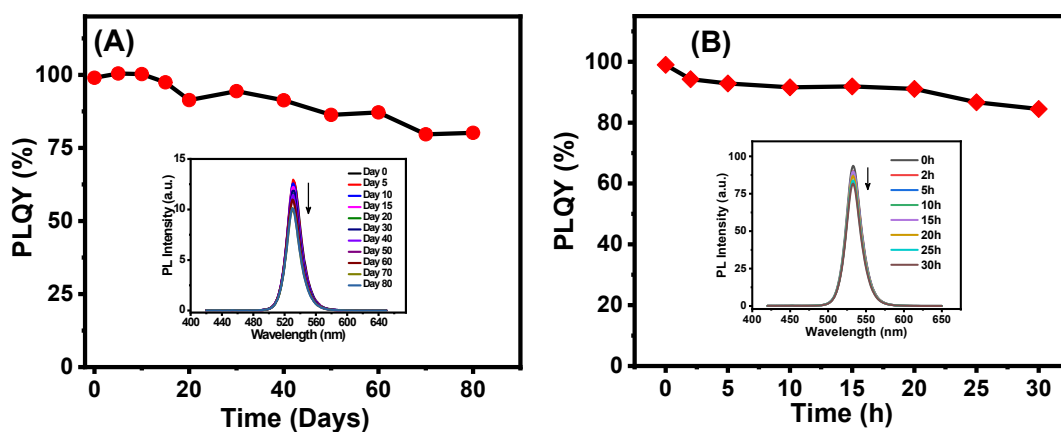

**Fig. S24** Change in PL spectrum of the FAPbBr<sub>3</sub> NCs with time (stored under ambient conditions). (B) Photoinduced change in the PLQY of the FAPbBr<sub>3</sub> NCs under continuous illumination of 365 nm UV light (8W). Inset shows the PL spectra of the sample during the testing period.

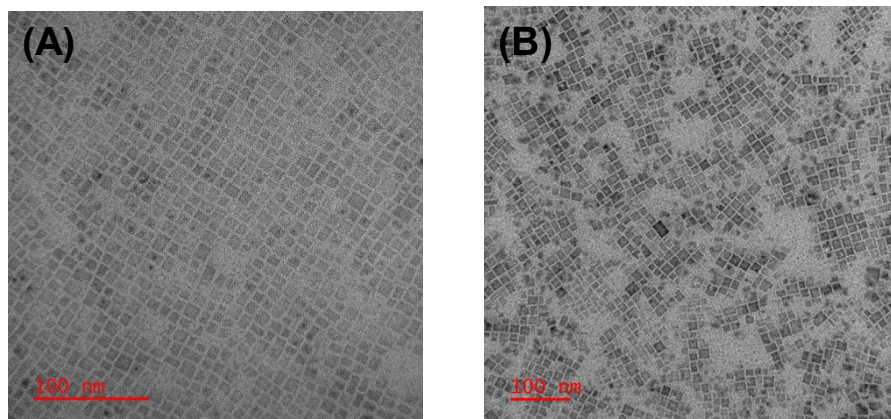

**Fig. S25** Bright-field TEM images of the (A) MAPbBr<sub>3</sub>, (B) FAPbBr<sub>3</sub> NCs taken after 80 days of storage under ambient condition. The scale bar is 100 nm in each image.

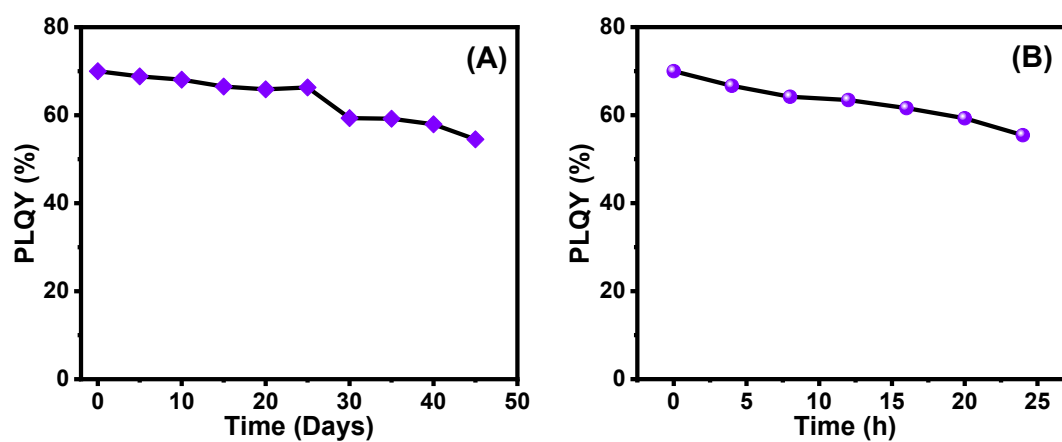

**Fig. S26** Time-dependent change in PLQY of the CsPbCl<sub>3</sub> NCs under (A) ambient condition and (B) UV light (365 nm, 8W) illumination highlighting the air-stability and photo-stability of the samples.

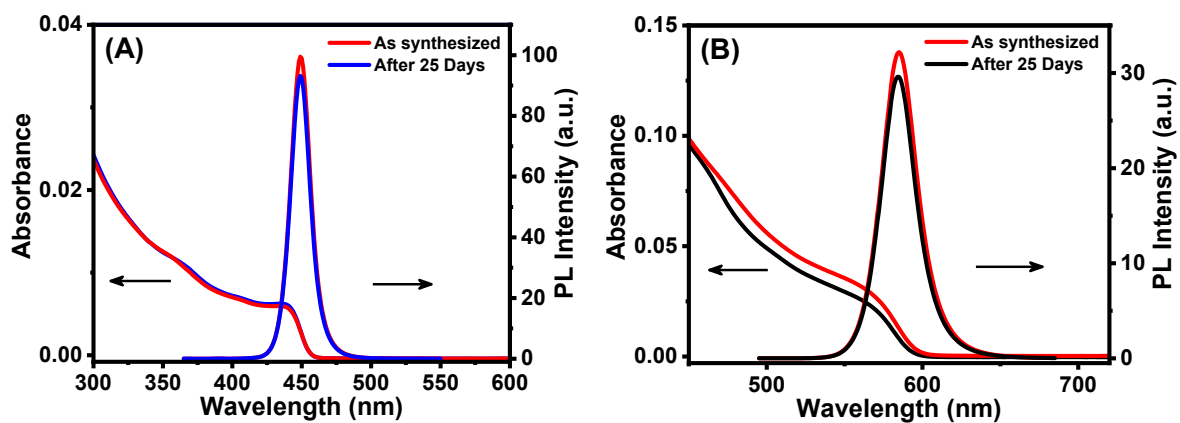

**Fig. S27** Absorption and PL spectra of (A) CsPbCl<sub>1.5</sub>Br<sub>1.5</sub> and (B) CsPbBr<sub>1.5</sub>I<sub>1.5</sub> NCs recorded after storing under ambient conditions for 25 days.

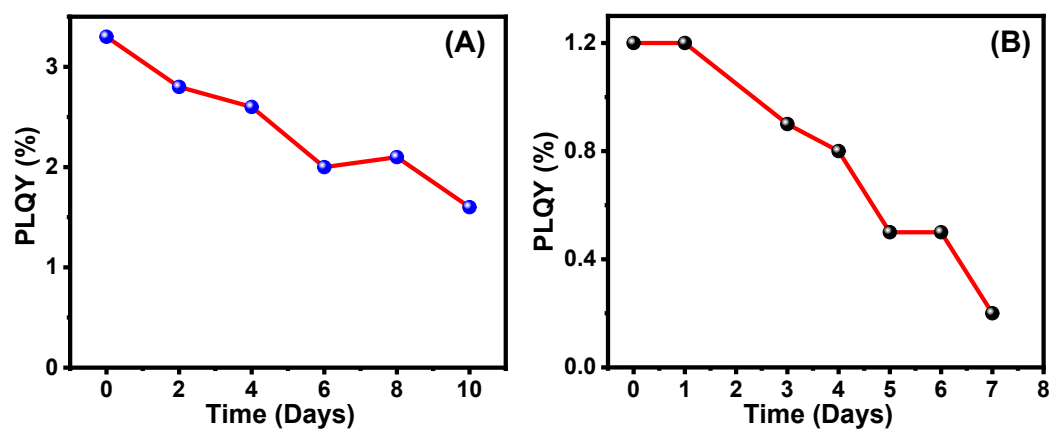

**Fig. S28** Time dependent evolution of PLQY of (A) MAPbCl<sub>3</sub> and (B) FAPbCl<sub>3</sub> NCs under ambient condition.

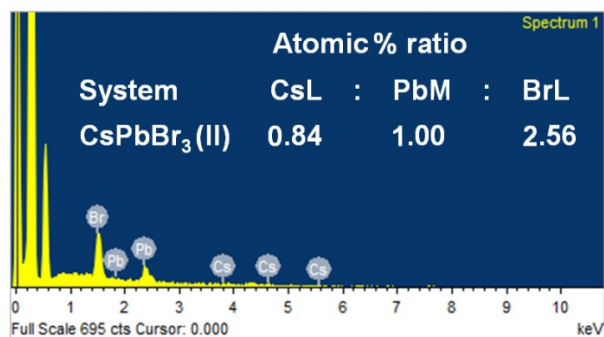

**Fig. S29** EDX spectrum of the CsPbBr<sub>3</sub>(II) NCs. The atomic % ratio of the constituting elements is indicated in the panel.

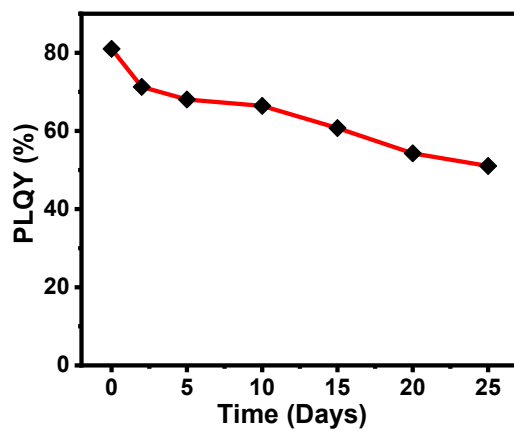

**Fig. S30** Time-dependent change in PLQY of the CsPbBr<sub>3</sub>(II) NCs stored under ambient condition.

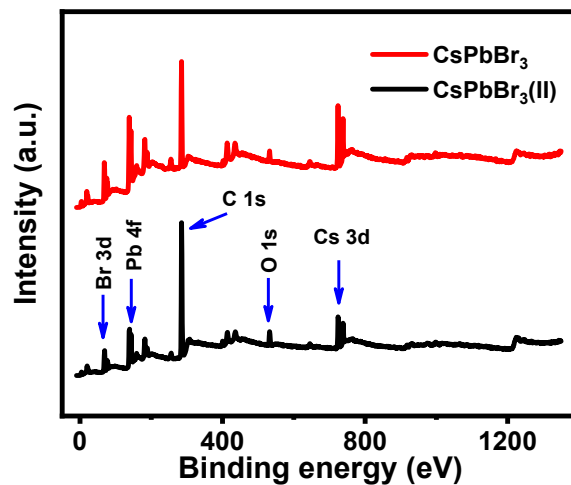

**Fig. S31** XPS general survey scans of the  $\text{CsPbBr}_3$  and  $\text{CsPbBr}_3(\text{II})$  NCs indicating the presence of all constituent elements in both samples. Both spectra were corrected with respect to C 1s peak at 285.0 eV.

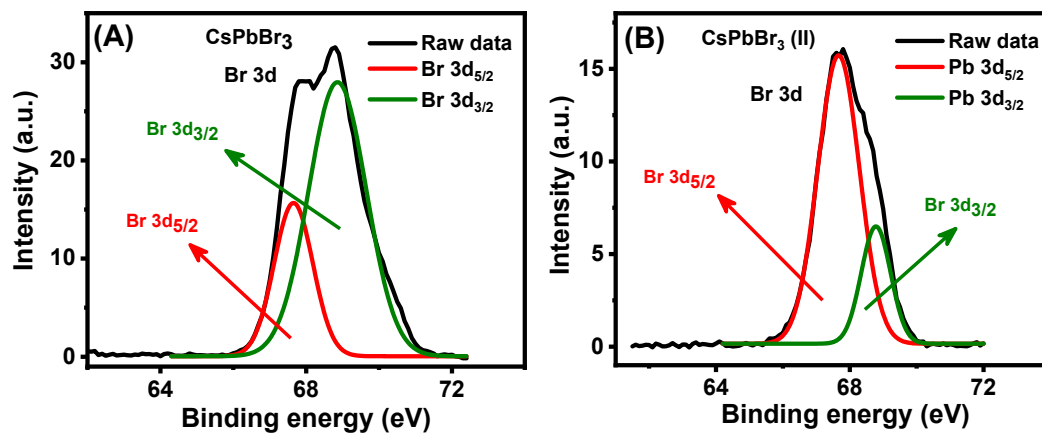

**Fig. S32** Core-level XPS spectra of Br 3d of (A)  $\text{CsPbBr}_3$  and (B)  $\text{CsPbBr}_3(\text{II})$  NCs.

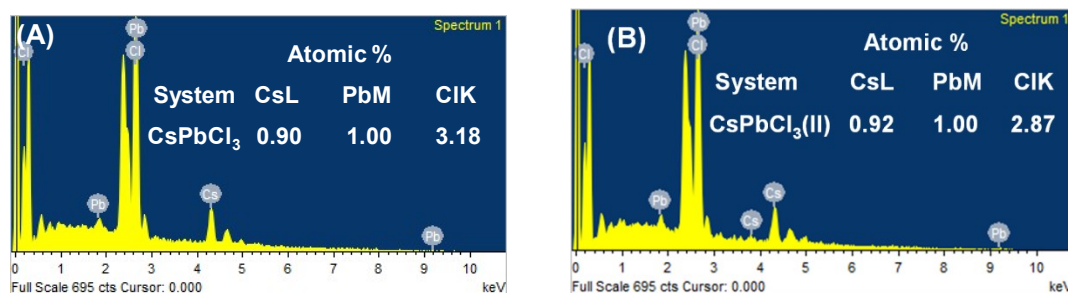

**Fig. S33** EDX spectra of (A) CsPbCl<sub>3</sub> and (B) CsPbCl<sub>3</sub>(II) NCs. Atomic % ratios of the NCs are shown in the panels.

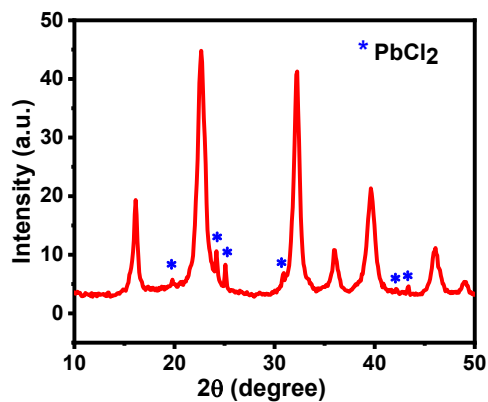

**Fig. S34** PXRD spectra of CsPbCl<sub>3</sub> NCs prepared with Pb:Cl molar ratio of 1:9. (\*) represent PbCl<sub>2</sub> diffraction peaks.

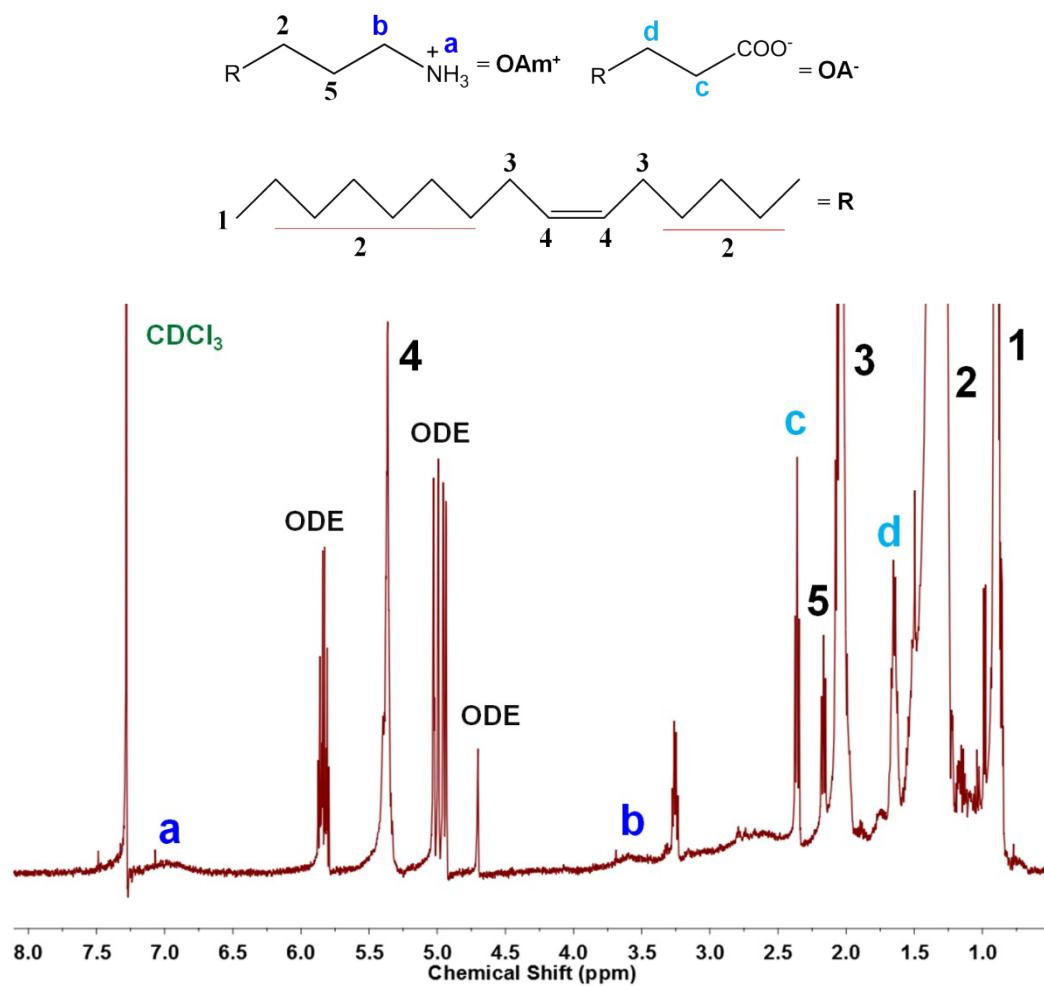

**Fig. S35** <sup>1</sup>H NMR spectrum of purified CsPbBr<sub>3</sub> NCs in CDCl<sub>3</sub>.

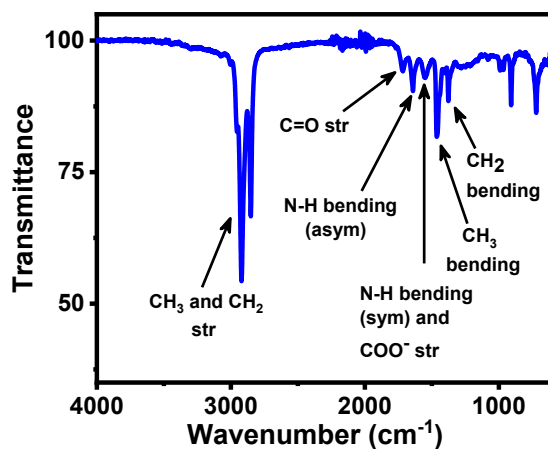

**Fig. S36** FTIR spectrum of purified CsPbBr<sub>3</sub> NCs in hexane.

Table S1: Dependence of the optical properties of the APbX<sub>3</sub> NCs on reaction temperature and Pb:X precursor molar ratio.

| Systems                  | Pb:X | Temperature (°C)      | PLQY (±2 %)       | FWHM (nm)         |
|--------------------------|------|-----------------------|-------------------|-------------------|
| CsPbBr <sub>3</sub>      | 1:3  | 165, 180, 200 and 210 | 66, 80, 91 and 99 | 26, 23, 20 and 19 |
| MAPbBr <sub>3</sub>      | 1:3  | 130, 150 and 165      | 52, 79 and 99     | 55, 26 and 21     |
| FAPbBr <sub>3</sub>      | 1:3  | 130, 150 and 165      | 68, 86, 99        | 29, 24 and 19     |
| CsPbCl <sub>3</sub>      | 1:3  | 165, 180, 200 and 210 | 39, 56, 64 and 70 | 14-10             |
| CsPbBr <sub>3</sub> (II) | 1:2  | 210                   | 81                | 20                |
| CsPbCl <sub>3</sub> (II) | 1:2  | 210                   | 36                | 11                |

Table S2: Comparison of the PLQY of violet-emitting CsPbCl<sub>3</sub> NCs obtained by different methods of direct synthesis.

| System              | Pb:Cl ratio | PLQY (%) | $\lambda_{em}$ (nm) | References       |
|---------------------|-------------|----------|---------------------|------------------|
| CsPbCl <sub>3</sub> | 1:(5.5-6.6) | 97       | 411                 | 8                |
|                     | 1:9         | 65       | 408                 | 9                |
|                     | 1:4.5       | 71       | 404                 | 10               |
|                     | 1:9         | 80       | 404                 | 11               |
|                     | 1.3         | 70±2     | 406                 | <b>This work</b> |

Table S3: PL decay parameters, radiative ( $k_r$ ) and non-radiative ( $k_{nr}$ ) rate constants of the APbX<sub>3</sub> NCs. The decay was monitored at the respective PL maximum after excitation at 375 nm (for violet-blue-emitting), 404 nm (for green-emitting) and 485 nm (for yellow-orange-emitting) samples. The  $k_r$  and  $k_{nr}$  values were calculated using  $k_r = \text{PLQY}/\langle\tau_{amp}\rangle$  and  $k_{nr} = (1 - \text{PLQY})/\langle\tau_{amp}\rangle$ .

| Systems                  | Pb:X ratio | $\tau_1(a_1)$<br>[ns] | $\tau_2(a_2)$<br>[ns] | $\tau_2(a_2)$<br>[ns] | $\langle\tau_{amp}\rangle$<br>[ns] | $k_r$<br>[ns <sup>-1</sup> ] | $k_{nr}$<br>[ns <sup>-1</sup> ] |
|--------------------------|------------|-----------------------|-----------------------|-----------------------|------------------------------------|------------------------------|---------------------------------|
| CsPbBr <sub>3</sub>      | 1:3        | 4.97 (0.73)           | 12.50 (0.27)          | ---                   | 7.0                                | 0.14                         | 0.001                           |
| CsPbBr <sub>3</sub> (II) | 1:2        | 5.31 (0.42)           | 20.65 (0.08)          | 0.61 (0.50)           | 4.18                               | 0.18                         | 0.057                           |
| MAPbBr <sub>3</sub>      | 1:3        | 8.50 (0.74)           | 29.20 (0.26)          | ---                   | 13.88                              | 0.07                         | 0.0007                          |
| FAPbBr <sub>3</sub>      | 1:3        | 21.02 (0.68)          | 65.80 (0.32)          | ---                   | 35.35                              | 0.03                         | 0.0003                          |
| CsPbCl <sub>3</sub>      | 1:3        | 4.63 (0.19)           | 20.72 (0.05)          | 0.47 (0.76)           | 2.48                               | 0.28                         | 0.120                           |
| CsPbCl <sub>3</sub> (II) | 1:2        | 3.67 (0.07)           | 18.05 (0.07)          | 0.40 (0.86)           | 1.86                               | 0.19                         | 0.344                           |
| MAPbCl <sub>3</sub>      | 1:1.5      | 4.52 (0.43)           | 12.79 (0.13)          | 1.05 (0.44)           | 4.10                               | 0.008                        | 0.240                           |
| FAPbCl <sub>3</sub>      | 1:3        | 3.90 (0.45)           | 15.39 (0.15)          | 0.59 (0.40)           | 4.30                               | 0.003                        | 0.229                           |

Table S4: Kinetic parameters of the bleach recovery dynamics of different samples of CsPbBr<sub>3</sub> and CsPbCl<sub>3</sub> NCs.

| Samples                  | Pb:X  | $\tau_1$ (a <sub>1</sub> )/ps | $\tau_2$ (a <sub>2</sub> )/ps | $\tau_3$ (a <sub>3</sub> )/ps |
|--------------------------|-------|-------------------------------|-------------------------------|-------------------------------|
| CsPbBr <sub>3</sub>      | 1:3   |                               | >1000                         |                               |
| CsPbBr <sub>3</sub> (II) | 1:2   | 53.2 (0.43)                   | >1000 (0.57)                  |                               |
| CsPbCl <sub>3</sub>      | 1:3   | 5.9±1.6 (0.31)                |                               | >1000 (0.69)                  |
| CsPbCl <sub>3</sub> (II) | 1:2   | 5.8±0.3 (0.29)                | 74.8±5 (0.56)                 | >1000 (0.15)                  |
| MAPbCl <sub>3</sub>      | 1:1.5 | 2.9±1.0 (0.60)                | 36.3±3.5 (0.26)               | >1000 (0.14)                  |
| FAPbCl <sub>3</sub>      | 1:3   | 2.1±0.4 (0.56)                | 20±2.2 (0.33)                 | >1000 (0.11)                  |

Table S5: Amount of DCDMH, DBDMH or DIDMH taken for the synthesis of mixed-halide NCs at 210°C.

| Systems                                 | Pb:X<br>ratio | X:X' ratio | DCDMH/mg | DBDMH/mg | DIDMH/mg |
|-----------------------------------------|---------------|------------|----------|----------|----------|
| CsPbCl <sub>2</sub> Br                  | 1:3           | 2:1        | 74.08    | 53.75    | ---      |
| CsPbCl <sub>1.5</sub> Br <sub>1.5</sub> | 1:3           | 1.5:1.5    | 55.56    | 80.63    | ---      |
| CsPbClBr <sub>2</sub>                   | 1:3           | 1:2        | 37.04    | 107.51   | ---      |
| CsPbBr <sub>2</sub> I                   | 1:3           | 2:1        | ---      | 107.51   | 71.42    |
| CsPbBr <sub>1.5</sub> I <sub>1.5</sub>  | 1:3           | 1.5:1.5    | ---      | 80.63    | 107.14   |
| CsPbBrI <sub>2</sub>                    | 1:3           | 2:1        | ---      | 53.75    | 142.85   |

Table S6: Optical properties of various mixed-halide CsPb(Cl/Br)<sub>3</sub> and CsPb(Br/I)<sub>3</sub> NCs.

| <b>Systems</b>                          | <b><math>\lambda_{\text{em}}</math> (nm)</b> | <b>PLQY (%)</b> | <b>FWHM (nm)</b> |
|-----------------------------------------|----------------------------------------------|-----------------|------------------|
| CsPbCl <sub>2</sub> Br                  | 431±2                                        | 87±1            | 12               |
| CsPbCl <sub>1.5</sub> Br <sub>1.5</sub> | 458±2                                        | 95±1            | 13               |
| CsPbClBr <sub>2</sub>                   | 478±2                                        | 96±1            | 15               |
| CsPbBr <sub>2</sub> I                   | 531±2                                        | 68±2            | 21               |
| CsPbBr <sub>1.5</sub> I <sub>1.5</sub>  | 584±2                                        | 86±2            | 32               |
| CsPbBrI <sub>2</sub>                    | 635±2                                        | 98±1            | 37               |

Table S7: Comparison of the optical properties of different mixed-halide systems obtained directly by different methods.

| Systems                                                                                                                                                                               | Synthetic strategy                                                                  | Method | PLQY (%)       | PL peak / FWHM (nm) | Ref.             |
|---------------------------------------------------------------------------------------------------------------------------------------------------------------------------------------|-------------------------------------------------------------------------------------|--------|----------------|---------------------|------------------|
| CsPbCl <sub>3</sub><br>CsPbCl <sub>1.5</sub> Br <sub>1.5</sub><br>CsPbClBr <sub>2</sub>                                                                                               | PbX <sub>2</sub> as lead and halide source                                          | LARP   | 10             | 10/12               | 12               |
|                                                                                                                                                                                       |                                                                                     |        | 37             | 455/16              |                  |
|                                                                                                                                                                                       |                                                                                     |        | 70             | 478/18              |                  |
|                                                                                                                                                                                       |                                                                                     |        |                |                     |                  |
| CsPbBr <sub>2</sub> I                                                                                                                                                                 |                                                                                     |        | 78             | 548/26              |                  |
| CsPbBr <sub>1.5</sub> I <sub>1.5</sub>                                                                                                                                                |                                                                                     |        | 72             | 600/38              |                  |
| CsPbBr <sub>1.2</sub> I <sub>1.8</sub>                                                                                                                                                |                                                                                     |        | 80             | 628/35              |                  |
| CsPbBrI <sub>2</sub>                                                                                                                                                                  |                                                                                     |        | 70             | 640/35              |                  |
| CsPb(Br <sub>1-x</sub> Cl <sub>x</sub> ) <sub>3</sub><br>Where x= 0-0.39                                                                                                              | Quaternary alkyl ammonium halides as additional halide source with PbX <sub>2</sub> | HI     | 25 (x = 0.39)  | 462                 | 13               |
|                                                                                                                                                                                       |                                                                                     |        | 32 (x = 0.24 ) | 476                 |                  |
|                                                                                                                                                                                       |                                                                                     |        | 48 (x = 0.19)  | 487                 |                  |
|                                                                                                                                                                                       |                                                                                     |        | 62 (x = 0.11)  | 499                 |                  |
|                                                                                                                                                                                       |                                                                                     |        | 80 (x = 0)     | 510                 |                  |
|                                                                                                                                                                                       |                                                                                     |        |                | FWHM= 18-20         |                  |
| CsPbCl <sub>3</sub><br>CsPbCl <sub>2</sub> Br<br>CsPbCl <sub>1.5</sub> Br <sub>1.5</sub><br>CsPbClBr <sub>2</sub><br>CsPbBr <sub>3</sub>                                              | N-chloro- and N-bromophthalimides as halide precursors                              | HI     | 80             | 404/9               | 11               |
|                                                                                                                                                                                       |                                                                                     |        | 85             | 428/14              |                  |
|                                                                                                                                                                                       |                                                                                     |        | 92             | 447/15              |                  |
|                                                                                                                                                                                       |                                                                                     |        | 97             | 475/17              |                  |
|                                                                                                                                                                                       |                                                                                     |        | 99             | 510/20              |                  |
| CsPbCl <sub>2</sub> Br<br>CsPbCl <sub>1.5</sub> Br <sub>1.5</sub><br>CsPbClBr <sub>2</sub><br>CsPbBr <sub>2</sub> I<br>CsPbBr <sub>1.5</sub> I <sub>1.5</sub><br>CsPbBrI <sub>2</sub> | DHDMH as halide precursor                                                           | HI     | 87±1           | 431±2/12            | <b>This work</b> |
|                                                                                                                                                                                       |                                                                                     |        | 95±1           | 458±2/13            |                  |
|                                                                                                                                                                                       |                                                                                     |        | 96±1           | 478±2/15            |                  |
|                                                                                                                                                                                       |                                                                                     |        | 68±2           | 531±2/21            |                  |
|                                                                                                                                                                                       |                                                                                     |        | 86±2           | 584±2/32            |                  |
|                                                                                                                                                                                       |                                                                                     |        | 98±1           | 635±2/37            |                  |

Table S8: PL decay components of different mixed-halide samples of CsPb(Cl/Br)<sub>3</sub> and CsPb(Br/I)<sub>3</sub> NCs.

| Systems                                 | $\tau_1(a_1)/\text{ns}$ | $\tau_2(a_2)/\text{ns}$ | $\tau_3(a_3)/\text{ns}$ | $\langle\tau_{\text{amp}}\rangle/\text{ns}$ | $k_r/\text{ns}^{-1}$ | $k_{\text{nr}}/\text{ns}^{-1}$ |
|-----------------------------------------|-------------------------|-------------------------|-------------------------|---------------------------------------------|----------------------|--------------------------------|
| CsPbCl <sub>2</sub> Br                  | 5.37(0.34)              | 17.32(0.09)             | 0.71(0.57)              | 3.79                                        | 0.23                 | 0.03                           |
| CsPbCl <sub>1.5</sub> Br <sub>1.5</sub> | 7.78(0.43)              | 24.20(0.08)             | 1.53(0.49)              | 6.03                                        | 0.16                 | 0.008                          |
| CsPbClBr <sub>2</sub>                   | 6.14(0.54)              | 16.60(0.10)             | 1.5(0.36)               | 5.52                                        | 0.17                 | 0.007                          |
| CsPbBr <sub>2</sub> I                   | 11.30(0.53)             | 30.90(0.17)             | 0.94(0.30)              | 11.52                                       | 0.06                 | 0.03                           |
| CsPbBr <sub>1.5</sub> I <sub>1.5</sub>  | 34.20(0.50)             | 88.60(0.30)             | 2.44(0.20)              | 44.17                                       | 0.02                 | 0.003                          |
| CsPbBrI <sub>2</sub>                    | 27.30(0.69)             | 84.60(0.31)             | ---                     | 45.06                                       | 0.02                 | 0.0004                         |

Table S9: Comparison of the optical properties and stability of the green- and violet-emitting perovskite NCs obtained by different three-precursor method of synthesis.

| Systems             | Halide precursor            | PLQY (%)/<br>FWHM (nm) | Stability parameters                                                                                   | References |
|---------------------|-----------------------------|------------------------|--------------------------------------------------------------------------------------------------------|------------|
| FAPbBr <sub>3</sub> | Oleylammonium bromide       | 85/22                  | Stable up to 2-3 round of purification with ACN                                                        | 2          |
| CsPbBr <sub>3</sub> | Tetraoctyl ammonium bromide | 78                     | ~20 % PLQY retained after 35 days in air and ~24% PLQY reduced after 3 heating-cooling circle at 100°C | 14         |
| CsPbBr <sub>3</sub> | Tetraoctyl ammonium bromide | 70                     | Stable towards purification with polar solvents up to 2 times                                          | 15         |

|                                                                                          |                                          |                         |                                                                                                                                                                                                                                                                                                                                                                                                                                                                                                       |    |
|------------------------------------------------------------------------------------------|------------------------------------------|-------------------------|-------------------------------------------------------------------------------------------------------------------------------------------------------------------------------------------------------------------------------------------------------------------------------------------------------------------------------------------------------------------------------------------------------------------------------------------------------------------------------------------------------|----|
| CsPbBr <sub>3</sub>                                                                      | NH <sub>4</sub> Br                       | 75/19                   | Stable towards purification                                                                                                                                                                                                                                                                                                                                                                                                                                                                           | 16 |
| FAPbBr <sub>3</sub>                                                                      | Octadecylamine bromide                   | 88/21                   | ~75% retention of PLQY after 50 days of storage in air                                                                                                                                                                                                                                                                                                                                                                                                                                                | 17 |
| CsPbBr <sub>3</sub><br>MAPbBr <sub>3</sub><br>FAPbBr <sub>3</sub><br>CsPbCl <sub>3</sub> | Benzoyl halide                           | 92/18<br>92/19<br>92/20 | NA                                                                                                                                                                                                                                                                                                                                                                                                                                                                                                    | 9  |
| CsPbBr <sub>3</sub>                                                                      | Trioctylphosphene-Br <sub>2</sub> adduct | 90/17                   | PLQY retained in the range of 70-90% for 28-50 days                                                                                                                                                                                                                                                                                                                                                                                                                                                   | 18 |
| CsPbBr <sub>3</sub>                                                                      | Benzoyl halide                           | 48-80/16-17             | NA                                                                                                                                                                                                                                                                                                                                                                                                                                                                                                    | 19 |
| CsPbCl <sub>3</sub>                                                                      | Oleylammonium halide                     | 97                      | 80% PLQY retained after 7 days                                                                                                                                                                                                                                                                                                                                                                                                                                                                        | 8  |
| CsPbBr <sub>3</sub>                                                                      |                                          | 97                      | NA                                                                                                                                                                                                                                                                                                                                                                                                                                                                                                    |    |
| CsPbBr <sub>3</sub><br>MAPbBr <sub>3</sub><br>FAPbBr <sub>3</sub>                        | N-bromosuccinamide                       | 99/18<br>98/21<br>95/20 | <p><i>Air-stability:</i> CsPbBr<sub>3</sub> retains 90% while MAPbBr<sub>3</sub> and FAPbBr<sub>3</sub> retains 85% of initial PLQY after 3 and 2 months in air, respectively</p> <p><i>Photo-stability:</i> CsPbBr<sub>3</sub>, MAPbBr<sub>3</sub> and FAPbBr<sub>3</sub> retains 81, 75 and 80% of their initial PL intensity after 24h of UV illumination</p> <p><i>Polar solvent stability:</i> CsPbBr<sub>3</sub> NCs retains 70% of its initial PL intensity after 24h in presence of water</p> | 20 |
| CsPbBr <sub>3</sub>                                                                      | Bromopropane                             | 78.5/18.2               | Initial PLQY reduced by 17% in air after 120 days and retained 67.85% under UV light for 96 h                                                                                                                                                                                                                                                                                                                                                                                                         | 21 |
| CsPbCl <sub>3</sub>                                                                      | Phenylphosphonic                         | 71/12                   | 80% and 50% of initial PLQY retained after 5h under UV light and                                                                                                                                                                                                                                                                                                                                                                                                                                      | 10 |

|                                                                   |                                    |                         |                                                                                                                                                                                                                                                                                                                                     |                  |
|-------------------------------------------------------------------|------------------------------------|-------------------------|-------------------------------------------------------------------------------------------------------------------------------------------------------------------------------------------------------------------------------------------------------------------------------------------------------------------------------------|------------------|
|                                                                   | dichloride                         |                         | 10 rounds of purification                                                                                                                                                                                                                                                                                                           |                  |
| CsPbCl <sub>3</sub>                                               | N-halophthalimide as halide source | 80/9                    | <i>Air-stability</i> : Retention of 85% PLQY after 2 weeks in ambient condition                                                                                                                                                                                                                                                     | 11               |
| CsPbBr <sub>3</sub>                                               |                                    | 99/20                   | NA                                                                                                                                                                                                                                                                                                                                  |                  |
| CsPbBr <sub>3</sub><br>MAPbBr <sub>3</sub><br>FAPbBr <sub>3</sub> | 1,3-dihalo-5,5-dimethylhydantoin   | 99/19<br>99/21<br>99/20 | <i>Air-stability</i> : ~80-85% of initial PL intensity retained after 70-80 days of storage under ambient condition<br><i>Photo-stability</i> : ~85% of initial PLQY restored after >30h of continuous UV irradiation<br><i>Polar solvent stability</i> : ~80% of initial PL intensity retained even after 24h in presence of water | <b>This work</b> |
| CsPbCl <sub>3</sub>                                               |                                    | 70/10                   | <i>Air/Photo-stability</i> : ~80% of initial PLQY retained after 45 days in ambient condition and under 24h UV irradiation, respectively.                                                                                                                                                                                           |                  |

Table S10: Advantages and disadvantages of different halide precursor used in hot-injection method of synthesis.

| Halide Precursor                              | Advantage                                                                                                                                                                                                                                                                                                  | Disadvantage/s                                                                                                                                                                                                                                                                         | Ref.         |
|-----------------------------------------------|------------------------------------------------------------------------------------------------------------------------------------------------------------------------------------------------------------------------------------------------------------------------------------------------------------|----------------------------------------------------------------------------------------------------------------------------------------------------------------------------------------------------------------------------------------------------------------------------------------|--------------|
| $\text{PbX}_2$<br>(X= Cl, Br and I)           | Most frequently used halide and lead precursor                                                                                                                                                                                                                                                             | Difficult to control composition of the final NCs due to sub-stoichiometric amount of halogen and the formed halide-deficient NCs show poor stability and optical properties.                                                                                                          | 1, 2, 22     |
| $\text{OAm}^+\text{X}^-$<br>(X= Cl, Br and I) | All three all-inorganic $\text{CsPbX}_3$ NCs with near-unity PLQY can be prepared.<br><br>Produces good quality $\text{FAPbX}_3$ (X= Br and I) NCs with high stability.                                                                                                                                    | Highly hygroscopic and hence, special protection is needed for storing the samples.<br><br>Systems like $\text{MAPbX}_3$ and $\text{FAPbCl}_3$ NCs are not reported yet.<br><br>In some cases, the NCs are moderately stable under ambient condition (1-2 weeks).                      | 2, 8, 23, 24 |
| Benzoyl halides                               | All $\text{APbX}_3$ NCs can be obtained.<br><br>The green-emitting $\text{APbBr}_3$ shows PLQY of ~92% and the violet/red-emitting $\text{CsPbCl}_3$ and $\text{CsPbI}_3$ NCs show PLQY of ~65 and 58%, respectively.<br><br>The $\text{CsPbI}_3$ NCs are stable for over 20 days under ambient condition. | The iodide-based NCs are moderately luminescent (PLQY between 45-58%).<br><br>Except $\text{CsPbI}_3$ NCs, stability of the other systems are not examined.<br><br>Optical properties and stability of the mixed-halide NCs are not explored.<br><br>Benzoyl halides are highly toxic. | 9            |
| $\text{NXI}_m$<br>(X= Cl, Br)                 | High quality $\text{APbBr}_3$ NCs with near-unity PLQY can be prepared with exceptional stability under ambient condition.<br><br>Blue-emitting NCs with PLQY of 85-97% and violet-emitting $\text{CsPbCl}_3$ NCs with second highest value of PLQY of 80% can be prepared.                                | Many systems like chloride and iodide-based hybrid NCs and yellow/orange-emitting mixed-halide NCs could not be obtained.<br><br>The $\text{CsPbI}_3$ NCs are weakly luminescent (PLQY ~27%) and stable only for a few days.                                                           | 11, 20       |

|                            |                                                                                                                                                                                                                                                                                                                                                                                                                                                                                             |                                                                                                                                                                                                                                                                         |                  |
|----------------------------|---------------------------------------------------------------------------------------------------------------------------------------------------------------------------------------------------------------------------------------------------------------------------------------------------------------------------------------------------------------------------------------------------------------------------------------------------------------------------------------------|-------------------------------------------------------------------------------------------------------------------------------------------------------------------------------------------------------------------------------------------------------------------------|------------------|
| DBDMH                      | PLQY of the APBr <sub>3</sub> NCs between ~91-95% can be prepared.                                                                                                                                                                                                                                                                                                                                                                                                                          | Only the green-emitting NCs are formed.<br><br>Stability of the NCs is moderate.                                                                                                                                                                                        | 25               |
| DXDMH<br>(X= Cl, Br and I) | APbBr <sub>3</sub> NCs exhibit near-unity PLQY with excellent stability.<br><br>Red/NIR-emitting APbI <sub>3</sub> NCs exhibit high phase stability for several months and possess PLQY in the range of 67-96%, highest by any common method till date.<br><br>PLQYs of the mixed-halide NCs are comparable or better than any previous method.<br><br>Provides a common method of achieving high quality all APbX <sub>3</sub> NCs emitting across the visible (extendable to NIR) region. | Violet-emitting MAPbCl <sub>3</sub> and FAPbCl <sub>3</sub> NCs exhibit poor optical properties and stability.<br><br>PLQY of CsPbCl <sub>3</sub> , MAPbI <sub>3</sub> and FAPbI <sub>3</sub> NCs are less than unity.<br><br>Size control of the NCs was unsuccessful. | <b>This work</b> |

Table S11: Atomic % ratio of the constituting elements (Cs, Pb and Br) and nitrogen (N) in CsPbBr<sub>3</sub> NCs obtained from XPS measurement.

| Samples                  | Area under the curve/ASF |          |          |          | Atomic % ratio<br>(with respect to Pb) |      |      |      |
|--------------------------|--------------------------|----------|----------|----------|----------------------------------------|------|------|------|
|                          | Cs                       | Pb       | Br       | N        | Cs                                     | Pb   | Br   | N    |
| CsPbBr <sub>3</sub>      | 24948.45                 | 29153.57 | 91152.43 | 53351.03 | 0.85                                   | 1.00 | 3.13 | 1.83 |
| CsPbBr <sub>3</sub> (II) | 18149.36                 | 19481.49 | 52471.89 | 28248.16 | 0.93                                   | 1.00 | 2.69 | 1.45 |

Table S12: Atomic % ratio of Cs, Pb and Cl in CsPbCl<sub>3</sub> NCs obtained with different Pb:Cl precursor molar ratio.

| <b>Pb:Cl molar<br/>ratio</b> | <b>Atomic % ratio</b> |            |            |
|------------------------------|-----------------------|------------|------------|
|                              | <b>CsL</b>            | <b>PbM</b> | <b>ClK</b> |
| 1:3                          | 0.90                  | 1.00       | 3.18       |
| 1:5                          | 0.88                  | 1.00       | 3.19       |
| 1:7                          | 0.91                  | 1.00       | 3.16       |
| 1:9                          | 0.95                  | 1.00       | 3.05       |

## References:

1. L. Protesescu, S. Yakunin, M. I. Bodnarchuk, F. Krieg, R. Caputo, C. H. Hendon, R. X. Yang, A. Walsh and M. V. Kovalenko, *Nano Lett.*, 2015, **15**, 3692–3696.
2. L. Protesescu, S. Yakunin, M. I. Bodnarchuk, F. Bertolotti, N. Masciocchi, A. Guagliardi and M. V. Kovalenko, *J. Am. Chem. Soc.*, 2016, **138**, 14202–14205.
3. A. De, S. Das and A. Samanta, *ACS Energy Lett.*, 2020, **5**, 2246–2252.
4. N. Mondal and A. Samanta, *Nanoscale*, 2017, **9**, 1878–1885.
5. A. Maciejewski and R. P. Steer, *Journal of Photochemistry*, 1986, **35**, 59–69.
6. K. Rurack and M. Spieles, *Anal. Chem.*, 2011, **83**, 1232–1242.
7. R.F.Kubin and A.N.Fletcher, *J. Lumin.*, 1982, **27**, 455–462.
8. A. Dutta, R. K. Behera, P. Pal, P. D. S. Baitalik and D. N. Pradhan, *Angew. Chem. Int. Ed.*, 2019, **58**, 5552–5556.
9. M. Imran, V. Caligiuri, M. Wang, L. Goldoni, M. Prato, R. Krahne, L. D. Trizio and L. Manna, *J. Am. Chem. Soc.*, 2018, **140**, 2656–2664.
10. C. Zhang, Q. Wan, L. K. Ono, Y. Liu, W. Zheng, Q. Zhang, M. Liu, L. Kong, L. Li and Y. Qi, *ACS Energy Lett.*, 2021, **6**, 3545–3554.
11. S. Paul, T. Ahmed, S. Das and A. Samanta, *J. Phys. Chem. C*, 2021, **125**, 23539–23547.
12. X. Li, Y. Wu, S. Zhang, B. Cai, Y. Gu, J. Song and H. Zeng, *Adv. Funct. Mater.*, 2016, **26**, 2435–2445.
13. Y. Shynkarenko, M. I. Bodnarchuk, C. Bernasconi, Y. Berezovska, V. Verteletskyi, S. T. Ochsenbein and M. V. Kovalenko, *ACS Energy Lett.*, 2019, **4**, 2703–2711.
14. S. Wei, Y. Yang, X. Kang, L. Wang, L. Huang and D. Pan, *Chem. Commun.*, 2016, **52**, 7265–7268.
15. E. Yassitepe, Z. Yang, O. Voznyy, Y. Kim, G. Walters, J. A. Castañeda, P. Kanjanaboos, M. Yuan, X. Gong, F. Fan, J. Pan, S. Hoogland, R. Comin, O. M. Bakr, L. A. Padilha, F. Nogueira and E. H. Sargent, *Adv. Funct. Mater.*, 2016, **26**, 8757–8763.

16. P. Liu, W. Chen, W. Wang, B. Xu, D. Wu, J. Hao, W. Cao, F. Fang, Y. Li, Y. Zeng, R. Pan, S. Chen, W. Cao, X. W. Sun and K. Wang, *Chem. Mater.*, 2017, **29**, 5168–5173.
17. Q. Li, H. Li, H. Shen, F. Wang, F. Zhao, F. Li, X. Zhang, D. Li, X. Jin and W. Sun, *ACS Photonics*, 2017, **4**, 2504–2512.
18. F. Krieg, S. T. Ochsenbein, S. Yakunin, S. t. Brinck, P. Aellen, A. Süess, B. Clerc, D. Guggisberg, O. Nazarenko, Y. Shynkarenko, S. Kumar, C.-J. Shih, I. Infante and M. V. Kovalenko, *ACS Energy Lett.*, 2018, **3**, 641–646.
19. M. Imran, P. Ijaz, D. Baranov, L. Goldoni, U. Petralanda, Q. Akkerman, A. L. Abdelhady, M. Prato, P. Bianchini, I. Infante and L. Manna, *Nano Lett.*, 2018, **18**, 7822–7831.
20. S. Paul and A. Samanta, *ACS Energy Lett.*, 2020, **5**, 64–69.
21. S. Akhil, V. G. V. Dutt and N. Mishra, *Nanoscale*, 2021, **13**, 13142–13151.
22. O. Vybornyi, S. Yakunin and M. V. Kovalenko, *Nanoscale*, 2016, **8**, 6278–6283.
23. Q. A. Akkerman, L. Martínez-Sarti, L. Goldoni, M. Imran, D. Baranov, H. J. Bolink, F. Palazon and L. Manna, *Chem. Mater.*, 2018, **30**, 6915–6921.
24. L. Protesescu, S. Yakunin, S. Kumar, J. Bär, F. Bertolotti, N. Masciocchi, A. Guagliardi, M. Grotevent, I. Shorubalko, M. I. Bodnarchuk, C.-J. Shih and M. V. Kovalenko, *ACS Nano*, 2017, **11**, 3119–3134.
25. S. K. Mahankudo, A. Das, K. Mishra, M. Barai, P. Mal and S. Ghosh, *ACS Appl. Nano Mater.*, 2022, **5**, 4360–4366.
